# Supplementary material for: A re-investigation of [Fe(l-cysteinate)2(CO)2]2−: an example of non-heme CO coordination of possible relevance to CO binding to ion channel receptors
Source: Royal Society of Chemistry journal article supplement (doi:10.1039/c1dt10338e), 2011-01-01
Supplement: c1dt10338e.pdf [file c1dt10338e.pdf]

## A re-investigation of $[\text{Fe}(\text{L-cysteinate})_2(\text{CO})_2]^{2-}$ : an example of non-heme CO coordination of possible relevance to CO binding to ion channel receptors. Supplementary Material

Lindsay Hewison,<sup>a</sup> Tony R. Johnson,<sup>a</sup> Brian E. Mann,<sup>\*a</sup> Anthony J. H. M. Meijer,<sup>a</sup> Philip Sawle<sup>b</sup> and Roberto Motterlini<sup>c</sup>

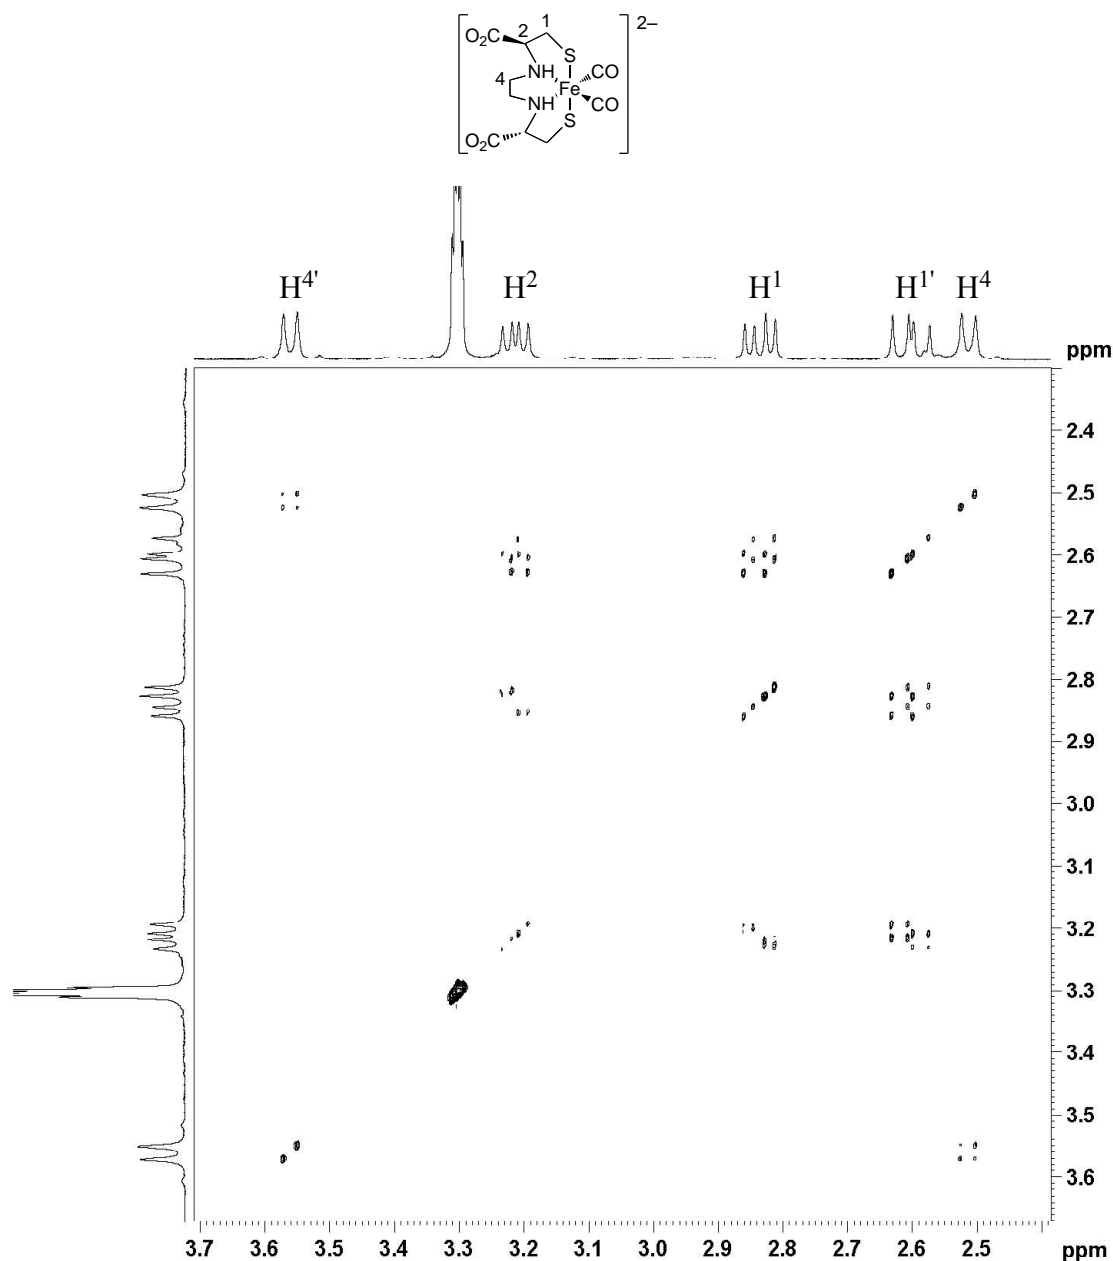

Fig. S1 400 MHz COSY-45 NMR spectrum of  $\text{K}_2[\text{Fe}\{\text{SCH}_2\text{CH}(\text{CO}_2)\text{NHCH}_2\}_2(\text{CO})_2]$  in  $\text{CD}_3\text{OD}$ .

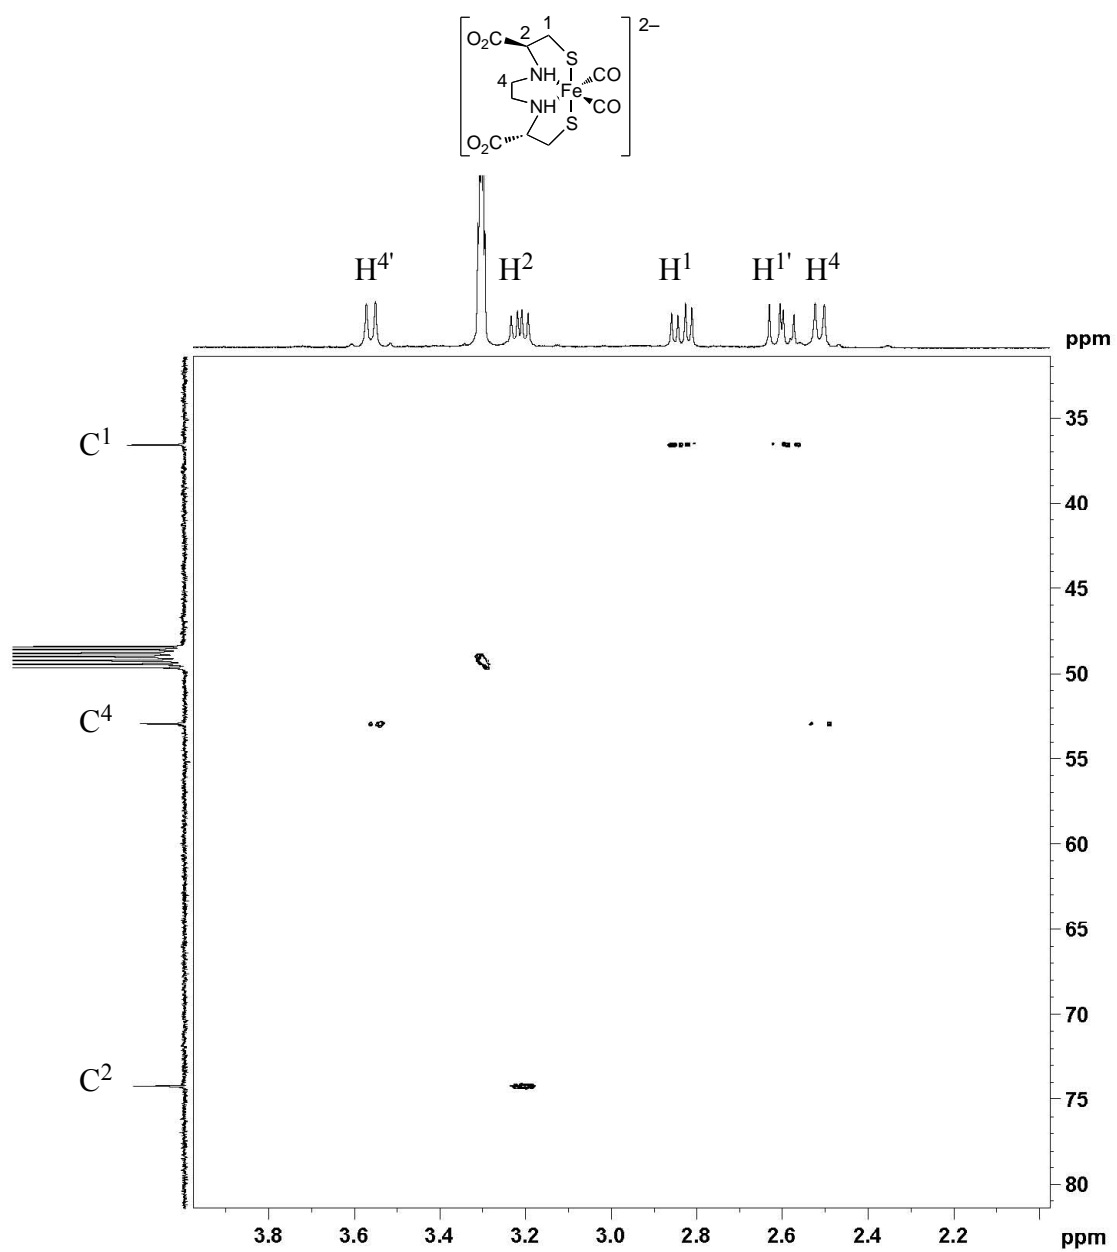

Fig. S2 100.62 MHz <sup>13</sup>C-<sup>1</sup>H correlation NMR spectrum of K<sub>2</sub>[Fe{SCH<sub>2</sub>CH(CO<sub>2</sub>)NHCH<sub>2</sub>}<sub>2</sub>(CO)<sub>2</sub>] in CD<sub>3</sub>OD.

**A re-investigation of  $[\text{Fe}(\text{L-cysteinate})_2(\text{CO})_2]^{2-}$ : a mechanistic model for the possible binding of CO to ion channel receptors.**  
**Supplementary information**

Lindsay Hewison,<sup>1</sup> Tony R. Johnson,<sup>1</sup> Brian E. Mann,<sup>1</sup> Anthony  
J. H. M. Meijer,<sup>1</sup> Philip Sawle,<sup>2</sup> and Roberto Motterlini<sup>2,3</sup>

<sup>1</sup>*Department of Chemistry, University of Sheffield, Sheffield S3 7HF, United Kingdom*

<sup>2</sup>*Vascular Biology Unit, Department of Surgical Research,  
Northwick Park Institute for Medical Research, Harrow, Middlesex, United Kingdom*

<sup>3</sup>*Department of Drug Discovery and Development,  
Italian Institute of Technology, 30 Via Morego, 16163 Genova, Italy*

(Dated: May 13, 2011)

## CONTENTS

|                                         |    |
|-----------------------------------------|----|
| 1. Structure 1 ( <i>in vacuo</i> )      | 4  |
| General Information                     | 4  |
| Cartesian Co-ordinates (XYZ format)     | 4  |
| 2. Structure 2 ( <i>in vacuo</i> )      | 6  |
| General Information                     | 6  |
| Cartesian Co-ordinates (XYZ format)     | 6  |
| 3. Structure 3a ( <i>in vacuo</i> )     | 8  |
| General Information                     | 8  |
| Cartesian Co-ordinates (XYZ format)     | 8  |
| 4. Structure 3b ( <i>in vacuo</i> )     | 10 |
| General Information                     | 10 |
| Cartesian Co-ordinates (XYZ format)     | 10 |
| 5. Structure 4a ( <i>in vacuo</i> )     | 12 |
| General Information                     | 12 |
| Cartesian Co-ordinates (XYZ format)     | 12 |
| 6. Structure 4b ( <i>in vacuo</i> )     | 14 |
| General Information                     | 14 |
| Cartesian Co-ordinates (XYZ format)     | 14 |
| 7. Structure 5a ( <i>in vacuo</i> )     | 16 |
| General Information                     | 16 |
| Cartesian Co-ordinates (XYZ format)     | 16 |
| 8. Structure 5b ( <i>in vacuo</i> )     | 18 |
| General Information                     | 18 |
| Cartesian Co-ordinates (XYZ format)     | 18 |
| 9. Structure 1 ( <i>in methanol</i> )   | 20 |
| General Information                     | 20 |
| Cartesian Co-ordinates (XYZ format)     | 20 |
| 10. Structure 2 ( <i>in methanol</i> )  | 22 |
| General Information                     | 22 |
| Cartesian Co-ordinates (XYZ format)     | 22 |
| 11. Structure 3a ( <i>in methanol</i> ) | 24 |
| General Information                     | 24 |
| Cartesian Co-ordinates (XYZ format)     | 24 |
| 12. Structure 3b ( <i>in methanol</i> ) | 26 |
| General Information                     | 26 |
| Cartesian Co-ordinates (XYZ format)     | 26 |
| 13. Structure 4a ( <i>in methanol</i> ) | 28 |
| General Information                     | 28 |
| Cartesian Co-ordinates (XYZ format)     | 28 |
| 14. Structure 4b ( <i>in methanol</i> ) | 30 |
| General Information                     | 30 |
| Cartesian Co-ordinates (XYZ format)     | 30 |
| 15. Structure 5a ( <i>in methanol</i> ) | 32 |
| General Information                     | 32 |

|                                         |    |
|-----------------------------------------|----|
|                                         | 3  |
| Cartesian Co-ordinates (XYZ format)     | 32 |
| 16. Structure 5b ( <i>in methanol</i> ) | 34 |
| General Information                     | 34 |
| Cartesian Co-ordinates (XYZ format)     | 34 |
| 17. Structure 1 ( <i>in water</i> )     | 36 |
| General Information                     | 36 |
| Cartesian Co-ordinates (XYZ format)     | 36 |
| 18. Structure 2 ( <i>in water</i> )     | 38 |
| General Information                     | 38 |
| Cartesian Co-ordinates (XYZ format)     | 38 |
| 19. Structure 3a ( <i>in water</i> )    | 40 |
| General Information                     | 40 |
| Cartesian Co-ordinates (XYZ format)     | 40 |
| 20. Structure 3b ( <i>in water</i> )    | 42 |
| General Information                     | 42 |
| Cartesian Co-ordinates (XYZ format)     | 42 |
| 21. Structure 4a ( <i>in water</i> )    | 44 |
| General Information                     | 44 |
| Cartesian Co-ordinates (XYZ format)     | 44 |
| 22. Structure 4b ( <i>in water</i> )    | 46 |
| General Information                     | 46 |
| Cartesian Co-ordinates (XYZ format)     | 46 |
| 23. Structure 5a ( <i>in water</i> )    | 48 |
| General Information                     | 48 |
| Cartesian Co-ordinates (XYZ format)     | 48 |
| 24. Structure 5b ( <i>in water</i> )    | 50 |
| General Information                     | 50 |
| Cartesian Co-ordinates (XYZ format)     | 50 |

## 1. STRUCTURE 1 (IN VACUO)

### General Information

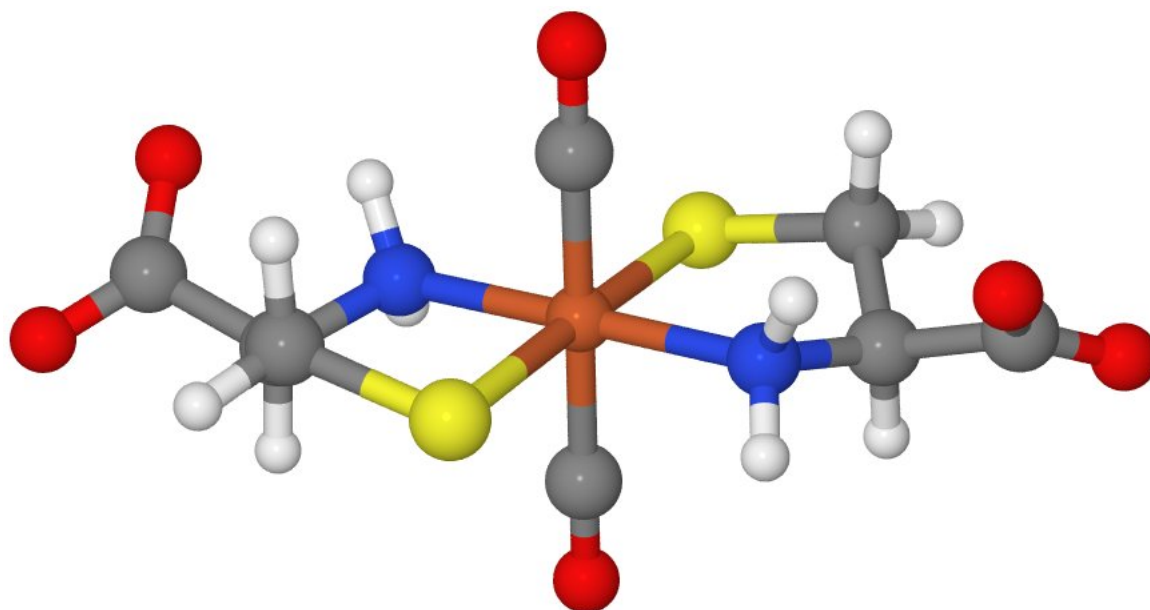

SMILES : C1C([NH2][Fe]2(S1)([NH2]C(CS2)C(=O)[O])([C][O])[C][O])C(=O)[O]  
Formula : C<sub>8</sub>H<sub>10</sub>FeN<sub>2</sub>O<sub>6</sub>S<sub>2</sub><sup>2-</sup>  
Charge : -2  
Multiplicity : 1  
Energy : -2932.28537934 a.u.  
Number of imaginary frequencies : 0

### Cartesian Co-ordinates (XYZ format)

29

```
N 1.15206325 -1.53092420 0.74678236
H 1.26189315 -1.53346968 1.76882589
C 2.56987405 -1.59469283 0.27456447
H 2.58932066 -2.07376051 -0.70725477
C 3.10526252 -0.17256454 0.14177553
C 3.44373775 -2.42521715 1.28891444
H 3.18757153 0.26755732 1.14167917
H 4.10378361 -0.21102031 -0.29360700
S 2.01938438 0.89720964 -0.90189272
O 2.94185328 -2.54277277 2.43691921
H 0.72521061 -2.43794131 0.57582957
O 4.53209877 -2.83508992 0.84402442
Fe -0.00665004 -0.04067471 -0.06488239
S -2.03889942 -1.01830351 0.70895082
C -3.05525589 0.48302883 0.35432583
C -2.63721299 1.17940676 -0.93680573
H -2.95236373 1.18995106 1.18497157
H -4.10546350 0.20119150 0.27874821
N -1.16622758 1.44510651 -0.88347536
H -2.84129643 0.51500684 -1.77987957
C -3.42721701 2.53009939 -1.12080956
```

|   |             |             |             |
|---|-------------|-------------|-------------|
| H | -1.12727189 | 2.36910343  | -0.43476650 |
| O | -2.77793455 | 3.56206298  | -0.80916601 |
| O | -4.60075331 | 2.41141319  | -1.51977050 |
| H | -0.85242087 | 1.65337837  | -1.82807446 |
| C | 0.14979780  | 0.92416352  | 1.47443569  |
| O | 0.24860173  | 1.52935469  | 2.44025421  |
| C | -0.16202313 | -1.00340366 | -1.60209525 |
| O | -0.25967199 | -1.60861218 | -2.56994128 |

## 2. STRUCTURE 2 (IN VACUO)

### General Information

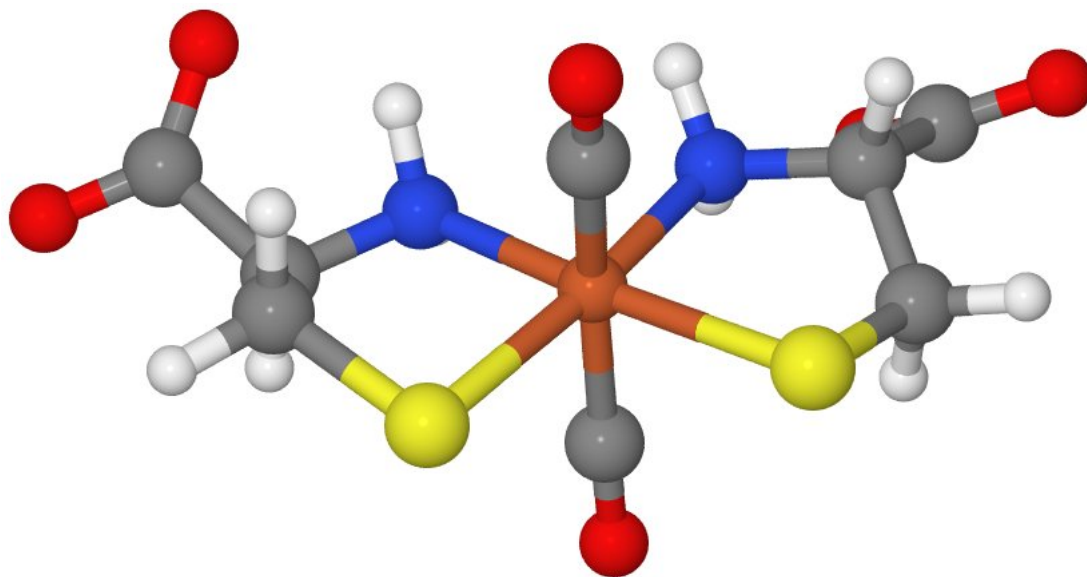

SMILES : C1C([NH2][Fe]2(S1)([NH2]C(CS2)C(=O)[O])([C][O])[C][O])C(=O)[O]  
Formula : C<sub>8</sub>H<sub>10</sub>FeN<sub>2</sub>O<sub>6</sub>S<sub>2</sub><sup>2-</sup>  
Charge : -2  
Multiplicity : 1  
Energy : -2932.28456247 a.u.  
Number of imaginary frequencies : 0

### Cartesian Co-ordinates (XYZ format)

29

```
N 1.24031305 -1.10264802 0.55627751
H 1.25715625 -1.19145787 1.58366549
C 2.70614862 -1.08083737 0.25207576
H 2.87149382 -1.55624676 -0.71760410
C 3.16732955 0.37008405 0.17645805
C 3.49036193 -1.86478102 1.37142515
H 3.11504388 0.80996621 1.17876768
H 4.20814085 0.39516538 -0.14764574
S 2.13709664 1.36938429 -0.98180103
O 2.84352994 -2.03557086 2.43966794
H 0.88790345 -2.00876927 0.25729766
O 4.65507364 -2.19242311 1.08199286
Fe 0.08076427 0.39060587 -0.24019514
S -1.43349922 2.03063703 -1.10834074
C -2.90025163 0.92110449 -0.97003555
C -2.90302348 0.12969889 0.33275363
H -2.90258741 0.21781756 -1.81041622
H -3.81292653 1.51508784 -1.02637708
N -1.58651066 -0.56975418 0.47130027
H -3.02292442 0.82311779 1.16847086
C -4.06892729 -0.92996854 0.34693617
H -1.81233752 -1.48982155 0.06366280
```



|   |             |             |             |
|---|-------------|-------------|-------------|
| O | -3.70215583 | -2.11256790 | 0.11101732  |
| O | -5.20705414 | -0.47361007 | 0.55685472  |
| H | -1.46577930 | -0.78384244 | 1.45833421  |
| C | 0.23173973  | 1.51680768  | 1.18438613  |
| O | 0.34665430  | 2.28997397  | 2.02289629  |
| C | 0.01241160  | -0.33884579 | -1.90859962 |
| O | -0.02004349 | -0.71578568 | -2.99071097 |

### 3. STRUCTURE 3A (IN VACUO)

#### General Information

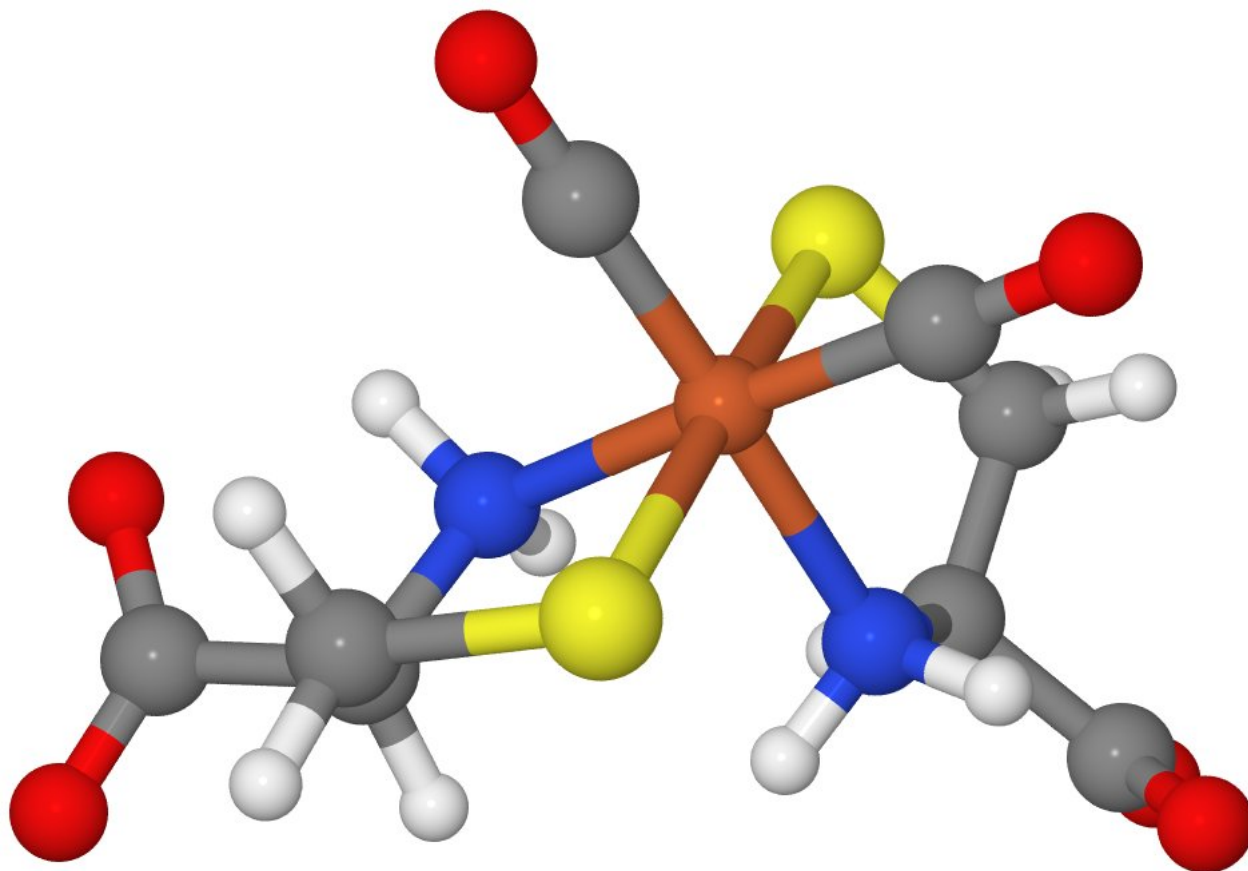

|                                 |   |                                                                                             |
|---------------------------------|---|---------------------------------------------------------------------------------------------|
| SMILES                          | : | C1C([NH2][Fe]2(S1)([NH2]C(CS2)C(=O)[O])([C][O])[C][O])C(=O)[O]                              |
| Formula                         | : | C <sub>8</sub> H <sub>10</sub> FeN <sub>2</sub> O <sub>6</sub> S <sub>2</sub> <sup>2-</sup> |
| Charge                          | : | -2                                                                                          |
| Multiplicity                    | : | 1                                                                                           |
| Energy                          | : | -2932.29962596 a.u.                                                                         |
| Number of imaginary frequencies | : | 0                                                                                           |

#### Cartesian Co-ordinates (XYZ format)

29

|   |            |             |             |
|---|------------|-------------|-------------|
| N | 0.88826460 | -0.62092507 | 1.09170771  |
| H | 0.93432862 | -0.62696910 | 2.12019277  |
| C | 2.33244896 | -0.62252235 | 0.71225119  |
| H | 2.45995736 | -1.17480028 | -0.22229035 |
| C | 2.77955437 | 0.82016408  | 0.50747794  |
| C | 3.19618082 | -1.30571938 | 1.84409308  |
| H | 2.80086470 | 1.32731354  | 1.47760487  |
| H | 3.79064965 | 0.83103043  | 0.09984917  |
| S | 1.65264475 | 1.74131048  | -0.63180023 |
| O | 2.63023639 | -1.36881590 | 2.96524954  |
| H | 0.47160619 | -1.52578247 | 0.88441020  |

|    |             |             |             |
|----|-------------|-------------|-------------|
| O  | 4.33885622  | -1.65850496 | 1.49907100  |
| Fe | -0.33639625 | 0.80421615  | 0.24119887  |
| S  | -2.21722507 | -0.39234489 | 1.03747582  |
| C  | -2.64725542 | -1.12960410 | -0.60187501 |
| C  | -1.40882671 | -1.56748700 | -1.37480533 |
| H  | -3.19416666 | -0.38955882 | -1.19517267 |
| H  | -3.30112290 | -1.98859119 | -0.44959670 |
| N  | -0.44562522 | -0.42710212 | -1.41018605 |
| H  | -0.94648737 | -2.41546559 | -0.86313599 |
| C  | -1.80510080 | -1.99648476 | -2.84206247 |
| H  | -0.68159473 | 0.02840957  | -2.30280590 |
| O  | -1.57945991 | -1.12413847 | -3.71914721 |
| O  | -2.32629871 | -3.12228918 | -2.94282198 |
| H  | 0.49665725  | -0.77116126 | -1.58084273 |
| C  | -0.19910431 | 1.81323171  | 1.68922782  |
| O  | -0.10822655 | 2.47836804  | 2.62128878  |
| C  | -1.40390384 | 1.98125958  | -0.53938752 |
| O  | -2.10679960 | 2.74433899  | -1.03243542 |

#### 4. STRUCTURE 3B (IN VACUO)

##### General Information

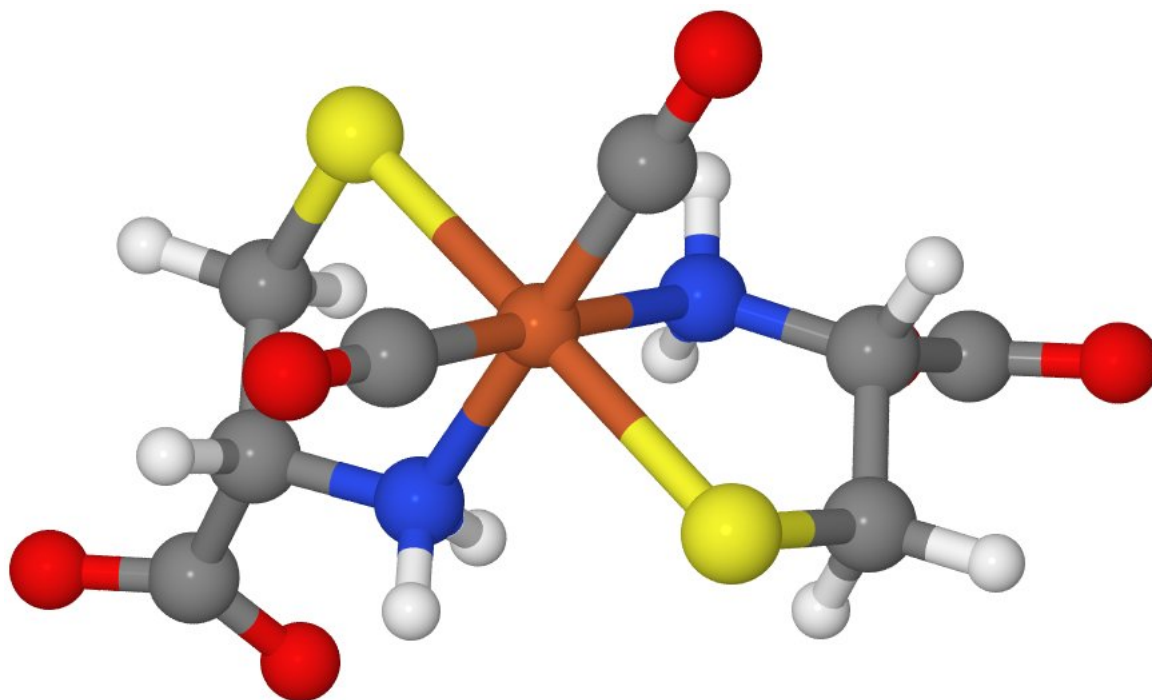

|                                   |   |                                                                                             |
|-----------------------------------|---|---------------------------------------------------------------------------------------------|
| SMILES                            | : | C1C([NH2][Fe]2(S1)([NH2]C(CS2)C(=O)[O])([C][O])[C][O])C(=O)[O]                              |
| Formula                           | : | C <sub>8</sub> H <sub>10</sub> FeN <sub>2</sub> O <sub>6</sub> S <sub>2</sub> <sup>2-</sup> |
| Charge                            | : | -2                                                                                          |
| Multiplicity                      | : | 1                                                                                           |
| Energy                            | : | -2932.29471357 a.u.                                                                         |
| Number of imaginary frequencies : | : | 0                                                                                           |

##### Cartesian Co-ordinates (XYZ format)

29

|    |             |             |             |
|----|-------------|-------------|-------------|
| N  | 1.21736336  | -0.51731163 | 0.75866812  |
| H  | 1.30143523  | -0.43027744 | 1.76907754  |
| C  | 2.58267999  | -0.54626358 | 0.15663163  |
| C  | 2.43007970  | -0.43863922 | -1.35459435 |
| H  | 3.41683793  | -0.34015319 | -1.80609214 |
| H  | 1.97163367  | -1.35687447 | -1.73581719 |
| S  | 1.38748527  | 1.01332593  | -1.84568369 |
| H  | 0.88419610  | -1.48180306 | 0.65694225  |
| Fe | -0.02776810 | 0.95645678  | 0.05547335  |
| S  | -1.43824232 | 0.71447212  | 1.94517982  |
| C  | -2.39785194 | -0.72871017 | 1.28726518  |
| C  | -2.54793572 | -0.67136866 | -0.22705109 |
| H  | -3.38737822 | -0.73885411 | 1.74332726  |
| H  | -1.88672471 | -1.65686977 | 1.56273854  |
| N  | -1.18797088 | -0.49608314 | -0.81616509 |
| H  | -1.27893436 | -0.29911262 | -1.81040967 |
| H  | -0.80005527 | -1.44534099 | -0.82355362 |
| C  | 0.98979247  | 2.17994595  | 0.83660376  |

|   |             |             |             |
|---|-------------|-------------|-------------|
| O | 1.63884521  | 2.98510981  | 1.33746004  |
| C | -1.11461306 | 2.20189357  | -0.58482736 |
| O | -1.80854702 | 3.02179098  | -0.99305439 |
| C | 3.36322927  | -1.85590148 | 0.55605906  |
| O | 2.64367652  | -2.78226995 | 1.00146556  |
| O | 4.59314060  | -1.81232202 | 0.35630375  |
| H | 3.13468480  | 0.32384485  | 0.52078563  |
| H | -3.14966416 | 0.20169361  | -0.49174622 |
| C | -3.25320411 | -1.96940327 | -0.77630091 |
| O | -2.48255515 | -2.79696965 | -1.31993949 |
| O | -4.48340416 | -2.01839590 | -0.57970226 |

## 5. STRUCTURE 4A (IN VACUO)

### General Information

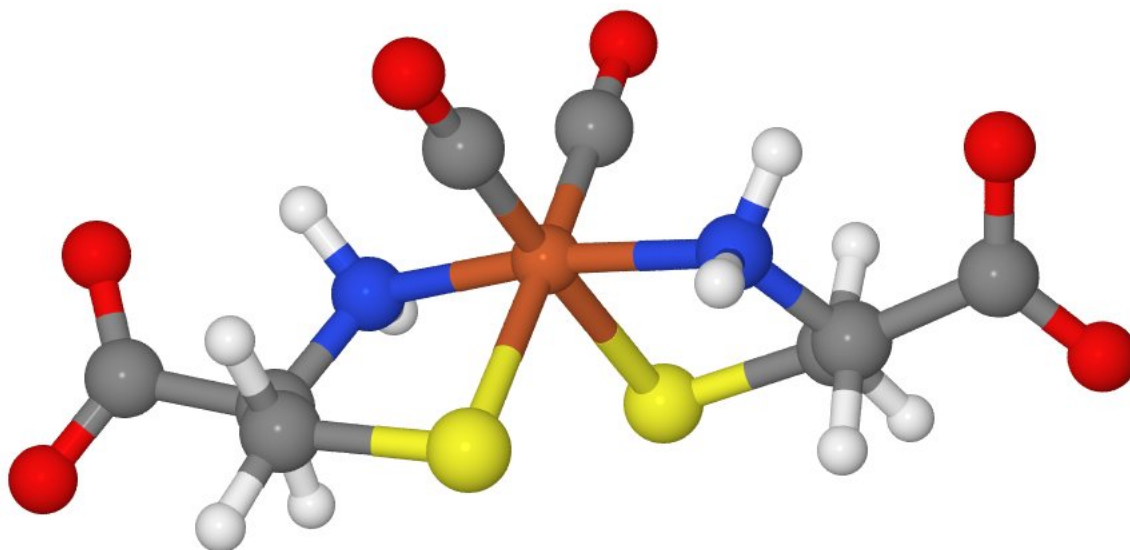

|                                 |   |                                                                                             |
|---------------------------------|---|---------------------------------------------------------------------------------------------|
| SMILES                          | : | C1C([NH2][Fe]2(S1)([NH2]C(CS2)C(=O)[O])([C][O])[C][O])C(=O)[O]                              |
| Formula                         | : | C <sub>8</sub> H <sub>10</sub> FeN <sub>2</sub> O <sub>6</sub> S <sub>2</sub> <sup>2-</sup> |
| Charge                          | : | -2                                                                                          |
| Multiplicity                    | : | 1                                                                                           |
| Energy                          | : | -2932.28997292 a.u.                                                                         |
| Number of imaginary frequencies | : | 0                                                                                           |

### Cartesian Co-ordinates (XYZ format)

29

|    |             |             |             |
|----|-------------|-------------|-------------|
| N  | 1.04339039  | -1.37864006 | 1.09757996  |
| H  | 1.03726017  | -1.49597120 | 2.12314725  |
| C  | 2.51872230  | -1.32939005 | 0.82722050  |
| H  | 2.72387934  | -1.89980149 | -0.08044112 |
| C  | 2.94947028  | 0.11449991  | 0.59875679  |
| C  | 3.29089069  | -1.97204006 | 2.04296970  |
| H  | 2.89940548  | 0.66637403  | 1.54364336  |
| H  | 3.98581314  | 0.12680888  | 0.26148650  |
| S  | 1.87492669  | 0.92421710  | -0.66184062 |
| O  | 2.59589958  | -2.14006615 | 3.08149362  |
| H  | 0.69522846  | -2.26309586 | 0.73614991  |
| O  | 4.49532652  | -2.21062922 | 1.84403098  |
| Fe | -0.16201524 | 0.07058121  | 0.29710275  |
| S  | -0.69708616 | -1.43937254 | -1.50016320 |
| C  | -2.15975022 | -0.45967001 | -2.04809165 |
| C  | -1.82468033 | 1.02610064  | -2.10055614 |
| H  | -2.99807930 | -0.62288642 | -1.36219764 |
| H  | -2.47254539 | -0.78839564 | -3.03905582 |
| N  | -1.20487237 | 1.44921052  | -0.80097198 |
| H  | -1.09958911 | 1.18966889  | -2.89979434 |
| C  | -3.11344552 | 1.89489233  | -2.36802292 |
| H  | -2.00462580 | 1.91882110  | -0.34770602 |
| O  | -3.52671909 | 2.54824829  | -1.37197781 |

|   |             |             |             |
|---|-------------|-------------|-------------|
| O | -3.58391404 | 1.81204462  | -3.51648498 |
| H | -0.54874831 | 2.19903374  | -1.00440001 |
| C | 0.19591138  | 1.26361763  | 1.56095922  |
| O | 0.39196634  | 2.05704331  | 2.37074614  |
| C | -1.60923660 | -0.64605701 | 1.03242862  |
| O | -2.52355504 | -1.12525249 | 1.54048169  |

## 6. STRUCTURE 4B (IN VACUO)

### General Information

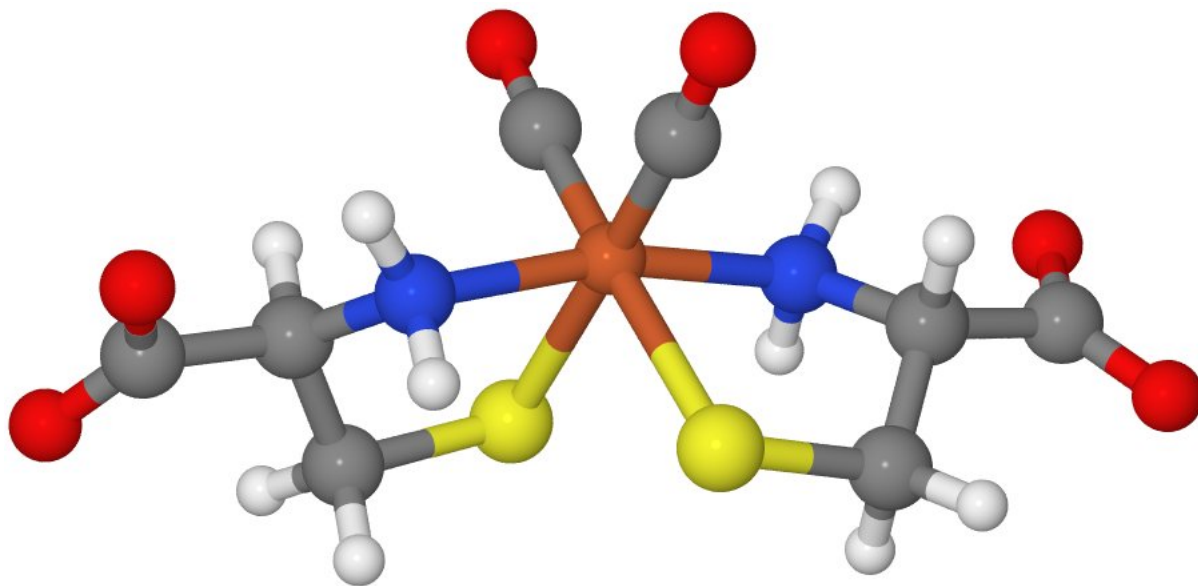

|                                 |   |                                                                                             |
|---------------------------------|---|---------------------------------------------------------------------------------------------|
| SMILES                          | : | C1C([NH2][Fe]2(S1)([NH2]C(CS2)C(=O)[O])([C][O])[C][O])C(=O)[O]                              |
| Formula                         | : | C <sub>8</sub> H <sub>10</sub> FeN <sub>2</sub> O <sub>6</sub> S <sub>2</sub> <sup>2-</sup> |
| Charge                          | : | -2                                                                                          |
| Multiplicity                    | : | 1                                                                                           |
| Energy                          | : | -2932.28682698 a.u.                                                                         |
| Number of imaginary frequencies | : | 0                                                                                           |

### Cartesian Co-ordinates (XYZ format)

29

|    |             |             |             |
|----|-------------|-------------|-------------|
| N  | 0.83500898  | -1.71228564 | 0.71702290  |
| H  | 1.02590322  | -1.33115482 | 1.64381504  |
| C  | 2.16731572  | -1.97419190 | 0.09514874  |
| H  | 1.97200406  | -2.34766245 | -0.91662210 |
| C  | 2.89480519  | -0.64863181 | -0.02429143 |
| C  | 2.91402602  | -3.13243413 | 0.85997963  |
| H  | 3.11580157  | -0.25403625 | 0.97301096  |
| H  | 3.83761120  | -0.79976976 | -0.54562235 |
| S  | 1.85223770  | 0.57089508  | -0.94408733 |
| O  | 2.15227079  | -3.87758970 | 1.52958322  |
| H  | 0.47183657  | -2.64575982 | 0.92149967  |
| O  | 4.14304876  | -3.20500088 | 0.67489433  |
| Fe | -0.30331644 | -0.29779899 | -0.20230567 |
| S  | -0.37275556 | 0.88179171  | 1.93193150  |
| C  | -1.03402960 | 2.47554946  | 1.26645207  |
| C  | -1.92435741 | 2.21271133  | 0.06692453  |
| H  | -0.19735679 | 3.11921287  | 0.97518456  |
| H  | -1.60631192 | 2.99054861  | 2.03507710  |
| N  | -1.13989234 | 1.41273725  | -0.92051029 |
| H  | -2.75625849 | 1.57795835  | 0.39303076  |
| C  | -2.57111382 | 3.46889138  | -0.63148308 |
| H  | -0.34816128 | 1.99625254  | -1.19131947 |



|   |             |             |             |
|---|-------------|-------------|-------------|
| O | -2.67714834 | 3.36157799  | -1.88093579 |
| O | -2.94214702 | 4.38410950  | 0.12662283  |
| H | -1.72539055 | 1.41454566  | -1.75851536 |
| C | -0.27783448 | -1.08410871 | -1.78971887 |
| O | -0.31186330 | -1.57659066 | -2.82919312 |
| C | -1.82811940 | -0.98330992 | 0.38417920  |
| O | -2.79980278 | -1.47780168 | 0.75229967  |

## 7. STRUCTURE 5A (IN VACUO)

### General Information

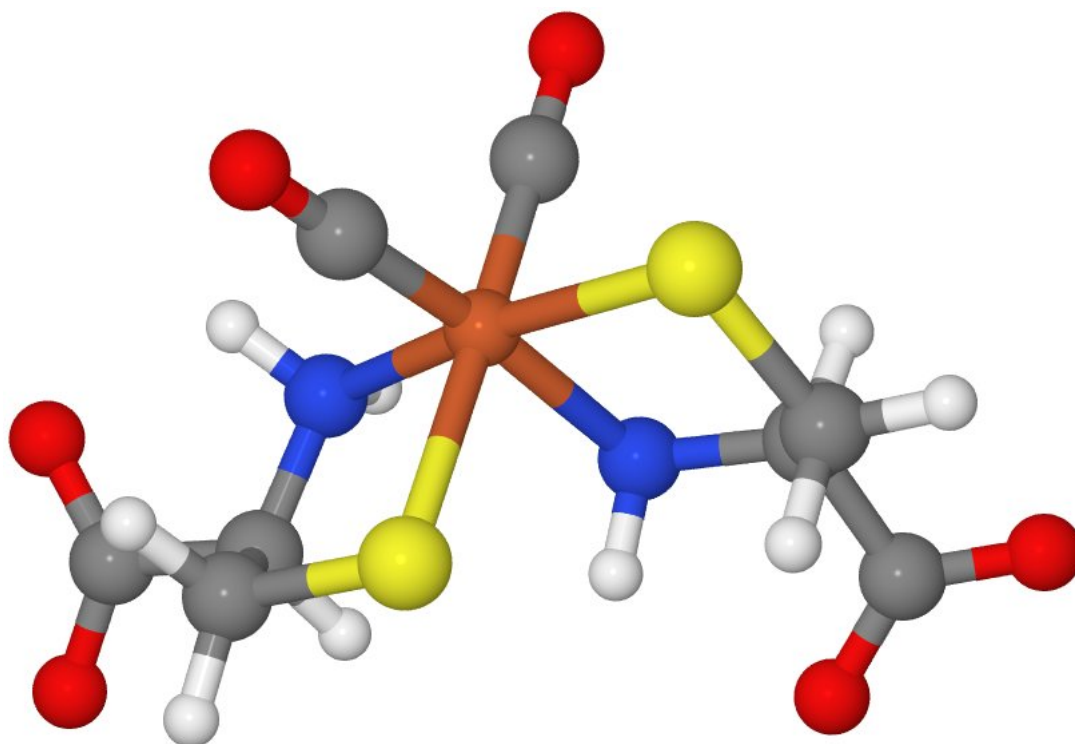

|                                 |   |                                                                                             |
|---------------------------------|---|---------------------------------------------------------------------------------------------|
| SMILES                          | : | C1C([NH2][Fe]2(S1)([NH2]C(CS2)C(=O)[O])([C][O])[C][O])C(=O)[O]                              |
| Formula                         | : | C <sub>8</sub> H <sub>10</sub> FeN <sub>2</sub> O <sub>6</sub> S <sub>2</sub> <sup>2-</sup> |
| Charge                          | : | -2                                                                                          |
| Multiplicity                    | : | 1                                                                                           |
| Energy                          | : | -2932.29194657 a.u.                                                                         |
| Number of imaginary frequencies | : | 0                                                                                           |

### Cartesian Co-ordinates (XYZ format)

29

|    |             |             |             |
|----|-------------|-------------|-------------|
| N  | 1.14446068  | -0.94744319 | 0.16923824  |
| H  | 1.27722275  | -0.64690477 | 1.13728559  |
| C  | 2.48522711  | -1.01719260 | -0.47778749 |
| H  | 2.30931807  | -1.26953244 | -1.53058660 |
| C  | 3.09777975  | 0.36752197  | -0.42850977 |
| C  | 3.33914280  | -2.20092130 | 0.11631901  |
| H  | 3.31627536  | 0.64318979  | 0.60817313  |
| H  | 4.03434515  | 0.37152979  | -0.98269719 |
| S  | 1.93865812  | 1.61487401  | -1.16545093 |
| O  | 2.64830279  | -3.11871576 | 0.62821901  |
| H  | 0.86178499  | -1.92748845 | 0.25751042  |
| O  | 4.57294083  | -2.11848187 | -0.03686812 |
| Fe | -0.10112783 | 0.50421405  | -0.56431192 |
| S  | -0.18381517 | 1.45596576  | 1.63633788  |
| C  | -1.90437448 | 0.88927764  | 1.99188936  |
| C  | -2.16111207 | -0.51965725 | 1.47519362  |

|   |             |             |             |
|---|-------------|-------------|-------------|
| H | -2.60998011 | 1.58093429  | 1.51882422  |
| H | -2.08592534 | 0.91475588  | 3.06652164  |
| N | -1.71056080 | -0.60768259 | 0.04776403  |
| H | -1.58312821 | -1.22909582 | 2.07157898  |
| C | -3.69437361 | -0.88366306 | 1.55760729  |
| H | -2.60458636 | -0.45903444 | -0.44616479 |
| O | -4.29861259 | -0.85637546 | 0.45124426  |
| O | -4.12769938 | -1.12097573 | 2.69810915  |
| H | -1.50537026 | -1.58620560 | -0.13864154 |
| C | -1.02050138 | 1.97207344  | -0.96532530 |
| O | -1.58323634 | 2.93755460  | -1.23287559 |
| C | -0.08970996 | -0.14797679 | -2.21098614 |
| O | -0.11268157 | -0.53626090 | -3.29449177 |

## 8. STRUCTURE 5B (IN VACUO)

### General Information

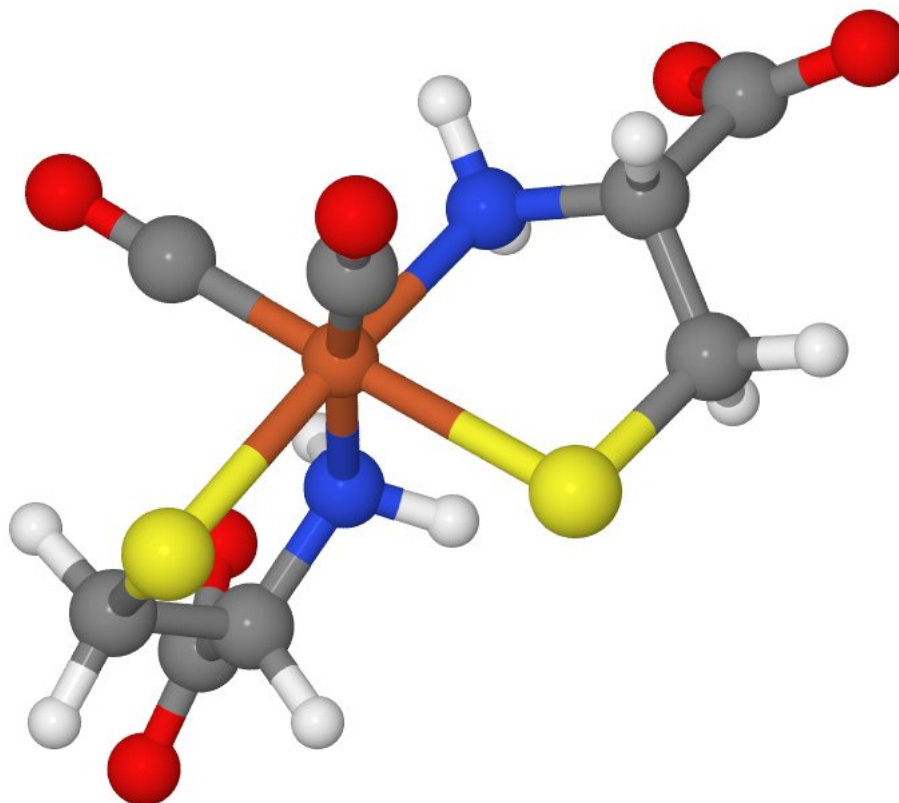

|                                   |   |                                                                                             |
|-----------------------------------|---|---------------------------------------------------------------------------------------------|
| SMILES                            | : | C1C([NH2][Fe]2(S1)([NH2]C(CS2)C(=O)[O])([C][O])[C][O])C(=O)[O]                              |
| Formula                           | : | C <sub>8</sub> H <sub>10</sub> FeN <sub>2</sub> O <sub>6</sub> S <sub>2</sub> <sup>2-</sup> |
| Charge                            | : | -2                                                                                          |
| Multiplicity                      | : | 1                                                                                           |
| Energy                            | : | -2932.29098763 a.u.                                                                         |
| Number of imaginary frequencies : | : | 0                                                                                           |

### Cartesian Co-ordinates (XYZ format)

29

|    |             |             |             |
|----|-------------|-------------|-------------|
| N  | 1.17547548  | -0.70035768 | 0.57291216  |
| H  | 1.17809522  | -0.84513962 | 1.59534550  |
| C  | 2.64184618  | -0.59419769 | 0.28464523  |
| H  | 2.86097312  | -1.18387794 | -0.60707074 |
| C  | 3.00702310  | 0.85726970  | 0.00355599  |
| C  | 3.46943140  | -1.15534735 | 1.50439215  |
| H  | 2.95041299  | 1.43733525  | 0.93056548  |
| H  | 4.03428793  | 0.90595359  | -0.35788420 |
| S  | 1.88077962  | 1.59986818  | -1.25522459 |
| O  | 2.80129194  | -1.34753025 | 2.55435824  |
| H  | 0.84949309  | -1.56921768 | 0.15633895  |
| O  | 4.68627262  | -1.31172895 | 1.29298341  |
| Fe | -0.07832737 | 0.71569633  | -0.24753669 |
| S  | -0.52844906 | -0.84740520 | -2.02376819 |

|   |             |             |             |
|---|-------------|-------------|-------------|
| C | -1.95607078 | -1.71324563 | -1.21759105 |
| C | -2.69224215 | -0.81827521 | -0.23096679 |
| H | -1.59098375 | -2.59970665 | -0.68610716 |
| H | -2.65959096 | -2.05206132 | -1.97764671 |
| N | -1.67890668 | -0.17892019 | 0.66394198  |
| H | -3.20213270 | -0.02254023 | -0.77994043 |
| C | -3.74845958 | -1.62785673 | 0.61073327  |
| H | -1.44517577 | -0.92160118 | 1.33062863  |
| O | -3.40002918 | -1.87576699 | 1.79290307  |
| O | -4.78592157 | -1.93824601 | -0.00461508 |
| H | -2.19178391 | 0.46896502  | 1.25687587  |
| C | 0.20536813  | 1.89229286  | 1.04429102  |
| O | 0.35974184  | 2.68551278  | 1.86387789  |
| C | -1.06682336 | 1.80795574  | -1.23915744 |
| O | -1.66395473 | 2.53747797  | -1.89683974 |

## 9. STRUCTURE 1 (IN METHANOL)

### General Information



|                                   |   |                                                                                             |
|-----------------------------------|---|---------------------------------------------------------------------------------------------|
| SMILES                            | : | C1C([NH2][Fe]2(S1)([NH2]C(CS2)C(=O)[O])([C][O])[C][O])C(=O)[O]                              |
| Formula                           | : | C <sub>8</sub> H <sub>10</sub> FeN <sub>2</sub> O <sub>6</sub> S <sub>2</sub> <sup>2-</sup> |
| Charge                            | : | -2                                                                                          |
| Multiplicity                      | : | 1                                                                                           |
| Energy                            | : | -2932.51914101 a.u.                                                                         |
| Number of imaginary frequencies : | : | 0                                                                                           |

### Cartesian Co-ordinates (XYZ format)

29

|    |             |             |             |
|----|-------------|-------------|-------------|
| N  | -1.88084340 | -0.82297200 | 0.14723130  |
| H  | -2.13875747 | -1.31500888 | -0.71399510 |
| C  | -3.01262307 | 0.12778310  | 0.35782155  |
| H  | -3.11090803 | 0.31369826  | 1.42900813  |
| C  | -2.70429850 | 1.44584811  | -0.34946659 |
| C  | -4.34487247 | -0.47381511 | -0.19227830 |
| H  | -2.70814991 | 1.28259110  | -1.43200767 |
| H  | -3.48234439 | 2.17163634  | -0.11431257 |
| S  | -1.06473255 | 2.12328696  | 0.15419793  |
| O  | -4.21817732 | -1.40606177 | -1.02818453 |
| H  | -1.95002878 | -1.55113971 | 0.85429418  |
| O  | -5.39456415 | 0.05981139  | 0.22498482  |
| Fe | -0.00000853 | -0.00017874 | 0.14711419  |
| S  | 1.06481242  | -2.12359285 | 0.14953159  |
| C  | 2.70428610  | -1.44508803 | -0.35300103 |
| C  | 3.01265049  | -0.12844364 | 0.35690749  |
| H  | 2.70796776  | -1.27964413 | -1.43521166 |
| H  | 3.48239660  | -2.17131877 | -0.11942922 |
| N  | 1.88078976  | 0.82268012  | 0.14841138  |
| H  | 3.11109900  | -0.31652722 | 1.42770147  |
| C  | 4.34478903  | 0.47434101  | -0.19215626 |

|   |             |             |             |
|---|-------------|-------------|-------------|
| H | 2.13850665  | 1.31642222  | -0.71189541 |
| O | 4.21792936  | 1.40820909  | -1.02622437 |
| O | 5.39456320  | -0.05999792 | 0.22398047  |
| H | 1.95010543  | 1.54947436  | 0.85687339  |
| C | -0.00025682 | 0.00171221  | -1.68072402 |
| O | -0.00038070 | 0.00291482  | -2.82221675 |
| C | 0.00023153  | -0.00211429 | 1.97588611  |
| O | 0.00038172  | -0.00336087 | 3.11734676  |

## 10. STRUCTURE 2 (IN METHANOL)

### General Information

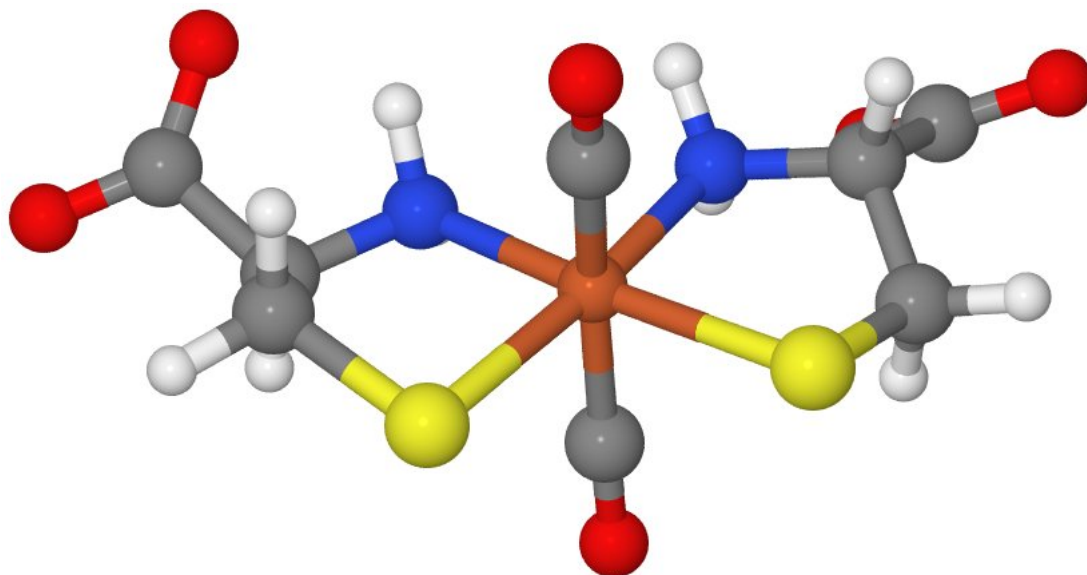

|                                 |   |                                                                                             |
|---------------------------------|---|---------------------------------------------------------------------------------------------|
| SMILES                          | : | C1C([NH2][Fe]2(S1)([NH2]C(CS2)C(=O)[O])([C][O])[C][O])C(=O)[O]                              |
| Formula                         | : | C <sub>8</sub> H <sub>10</sub> FeN <sub>2</sub> O <sub>6</sub> S <sub>2</sub> <sup>2-</sup> |
| Charge                          | : | -2                                                                                          |
| Multiplicity                    | : | 1                                                                                           |
| Energy                          | : | -2932.52041738 a.u.                                                                         |
| Number of imaginary frequencies | : | 0                                                                                           |

### Cartesian Co-ordinates (XYZ format)

29

|    |             |             |             |
|----|-------------|-------------|-------------|
| N  | 1.43810380  | 1.01033092  | 0.15472607  |
| H  | 1.57638931  | 1.57919705  | -0.68775606 |
| C  | 2.82189178  | 0.55195498  | 0.47882590  |
| H  | 2.89701796  | 0.41943270  | 1.55972898  |
| C  | 3.08374763  | -0.78625989 | -0.20777735 |
| C  | 3.87029719  | 1.60953534  | 0.00610623  |
| H  | 3.11576247  | -0.63414305 | -1.29147947 |
| H  | 4.05218077  | -1.17376363 | 0.10794675  |
| S  | 1.77449727  | -2.02037263 | 0.19007699  |
| O  | 3.46811676  | 2.42018867  | -0.86919028 |
| H  | 1.17149138  | 1.69420540  | 0.85953861  |
| O  | 5.00702572  | 1.51557076  | 0.51484770  |
| Fe | -0.00001447 | -0.43582454 | 0.00024147  |
| S  | -1.77460289 | -2.02055764 | -0.18734233 |
| C  | -3.08375001 | -0.78585911 | 0.20902744  |
| C  | -2.82195592 | 0.55139810  | -0.47945827 |
| H  | -3.11558795 | -0.63225949 | 1.29252505  |
| H  | -4.05224752 | -1.17375851 | -0.10601223 |
| N  | -1.43808377 | 1.01017368  | -0.15627310 |
| H  | -2.89730763 | 0.41738957  | -1.56016254 |
| C  | -3.87021852 | 1.60968781  | -0.00801239 |
| H  | -1.57620597 | 1.58038080  | 0.68533212  |



|   |             |             |             |
|---|-------------|-------------|-------------|
| O | -3.46779442 | 2.42163324  | 0.86597514  |
| O | -5.00707817 | 1.51499927  | -0.51632589 |
| H | -1.17152393 | 1.69290328  | -0.86221164 |
| C | 0.18233886  | -0.63925189 | -1.80638313 |
| O | 0.29749912  | -0.86383468 | -2.92125058 |
| C | -0.18236278 | -0.63676143 | 1.80714083  |
| O | -0.29750943 | -0.85981387 | 2.92231798  |

## 11. STRUCTURE 3A (IN METHANOL)

### General Information



|                                 |   |                                                                                             |
|---------------------------------|---|---------------------------------------------------------------------------------------------|
| SMILES                          | : | C1C([NH2][Fe]2(S1)([NH2]C(CS2)C(=O)[O])([C][O])[C][O])C(=O)[O]                              |
| Formula                         | : | C <sub>8</sub> H <sub>10</sub> FeN <sub>2</sub> O <sub>6</sub> S <sub>2</sub> <sup>2-</sup> |
| Charge                          | : | -2                                                                                          |
| Multiplicity                    | : | 1                                                                                           |
| Energy                          | : | -2932.53285350 a.u.                                                                         |
| Number of imaginary frequencies | : | 0                                                                                           |

### Cartesian Co-ordinates (XYZ format)

29

|   |             |             |             |
|---|-------------|-------------|-------------|
| N | -1.24366176 | -0.58583462 | -0.67553109 |
| H | -1.86995494 | -0.31263834 | -1.44050014 |
| C | -2.16200471 | -1.22170722 | 0.31219214  |
| H | -1.61642694 | -1.99629617 | 0.85496569  |
| C | -2.63716602 | -0.15824772 | 1.29755449  |
| C | -3.38603497 | -1.86953032 | -0.41451910 |
| H | -3.29950571 | 0.54449242  | 0.78304243  |
| H | -3.20266128 | -0.62610978 | 2.10345459  |
| S | -1.21379709 | 0.77065897  | 2.01771450  |
| O | -3.62058330 | -1.43648648 | -1.57248783 |
| H | -0.65950716 | -1.30009961 | -1.10467780 |

|    |             |             |             |
|----|-------------|-------------|-------------|
| O  | -4.02337456 | -2.71686220 | 0.24528080  |
| Fe | 0.00001664  | 0.91041255  | 0.00002392  |
| S  | 1.21385109  | 0.77077591  | -2.01765966 |
| C  | 2.63717294  | -0.15825081 | -1.29756677 |
| C  | 2.16194987  | -1.22178531 | -0.31231648 |
| H  | 3.29953194  | 0.54441196  | -0.78297395 |
| H  | 3.20266342  | -0.62605780 | -2.10350275 |
| N  | 1.24362075  | -0.58596104 | 0.67544973  |
| H  | 1.61635423  | -1.99630249 | -0.85517406 |
| C  | 3.38593483  | -1.86971962 | 0.41436449  |
| H  | 1.86991251  | -0.31286144 | 1.44045568  |
| O  | 3.62037373  | -1.43688762 | 1.57243478  |
| O  | 4.02336216  | -2.71689343 | -0.24555355 |
| H  | 0.65942132  | -1.30023718 | 1.10451734  |
| C  | -1.11931133 | 2.14723849  | -0.61688131 |
| O  | -1.85025668 | 2.93697190  | -1.00663066 |
| C  | 1.11939383  | 2.14712286  | 0.61707449  |
| O  | 1.85036075  | 2.93677807  | 1.00694036  |

## 12. STRUCTURE 3B (IN METHANOL)

### General Information



|                                 |   |                                                                                             |
|---------------------------------|---|---------------------------------------------------------------------------------------------|
| SMILES                          | : | C1C([NH2][Fe]2(S1)([NH2]C(CS2)C(=O)[O])([C][O])[C][O])C(=O)[O]                              |
| Formula                         | : | C <sub>8</sub> H <sub>10</sub> FeN <sub>2</sub> O <sub>6</sub> S <sub>2</sub> <sup>2-</sup> |
| Charge                          | : | -2                                                                                          |
| Multiplicity                    | : | 1                                                                                           |
| Energy                          | : | -2932.53159340 a.u.                                                                         |
| Number of imaginary frequencies | : | 0                                                                                           |

### Cartesian Co-ordinates (XYZ format)

29

|    |             |             |             |
|----|-------------|-------------|-------------|
| N  | -1.17087030 | 0.40652975  | 0.81083065  |
| H  | -1.35158336 | 0.19531797  | 1.78968823  |
| C  | -2.46824002 | 0.68317229  | 0.13179594  |
| C  | -2.26220870 | 0.60616988  | -1.37844396 |
| H  | -3.22711992 | 0.67133069  | -1.88093555 |
| H  | -1.65570116 | 1.45508897  | -1.70796108 |
| S  | -1.43171918 | -0.96718013 | -1.87289262 |
| H  | -0.71600103 | 1.32380414  | 0.85659891  |
| Fe | -0.00006168 | -1.07699275 | -0.00010991 |
| S  | 1.43159521  | -0.96751183 | 1.87269533  |
| C  | 2.26217794  | 0.60588378  | 1.37853169  |
| C  | 2.46803904  | 0.68323332  | -0.13171287 |
| H  | 3.22715235  | 0.67083353  | 1.88092983  |
| H  | 1.65578353  | 1.45478213  | 1.70831120  |
| N  | 1.17053008  | 0.40693066  | -0.81061339 |
| H  | 1.35102367  | 0.19618419  | -1.78961420 |
| H  | 0.71565503  | 1.32422721  | -0.85583270 |
| C  | -1.05036807 | -2.31231570 | 0.73435980  |

|   |             |             |             |
|---|-------------|-------------|-------------|
| O | -1.73336983 | -3.10514092 | 1.19776046  |
| C | 1.05042708  | -2.31195521 | -0.73492444 |
| O | 1.73352671  | -3.10456491 | -1.19854999 |
| C | -3.01263332 | 2.09514213  | 0.52088600  |
| O | -2.15906310 | 2.90159678  | 0.97208500  |
| O | -4.22800064 | 2.28677368  | 0.30368617  |
| H | -3.18482232 | -0.08203422 | 0.43636119  |
| H | 3.18448997  | -0.08197836 | -0.43657389 |
| C | 3.01252246  | 2.09523749  | -0.52051413 |
| O | 2.15898132  | 2.90182471  | -0.97152758 |
| O | 4.22788286  | 2.28678036  | -0.30319831 |

13. STRUCTURE 4A (IN METHANOL)

General Information

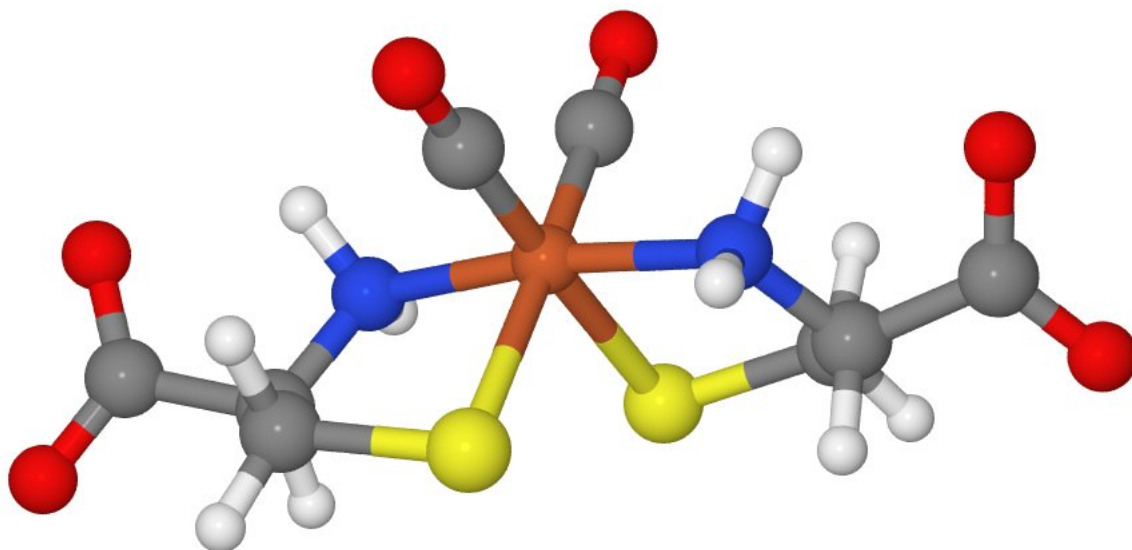

|                                 |   |                                                                                             |
|---------------------------------|---|---------------------------------------------------------------------------------------------|
| SMILES                          | : | C1C([NH2][Fe]2(S1)([NH2]C(CS2)C(=O)[O])([C][O])[C][O])C(=O)[O]                              |
| Formula                         | : | C <sub>8</sub> H <sub>10</sub> FeN <sub>2</sub> O <sub>6</sub> S <sub>2</sub> <sup>2-</sup> |
| Charge                          | : | -2                                                                                          |
| Multiplicity                    | : | 1                                                                                           |
| Energy                          | : | -2932.52564930 a.u.                                                                         |
| Number of imaginary frequencies | : | 0                                                                                           |

Cartesian Co-ordinates (XYZ format)

29

|    |             |             |             |
|----|-------------|-------------|-------------|
| N  | 1.88258779  | 0.23194255  | 0.78922641  |
| H  | 2.44117832  | 1.09321892  | 0.80740935  |
| C  | 2.81520081  | -0.75063068 | 0.15417261  |
| H  | 2.64024711  | -1.73010957 | 0.60178578  |
| C  | 2.53568459  | -0.83226162 | -1.34313560 |
| C  | 4.29610586  | -0.31794351 | 0.40491450  |
| H  | 2.83137274  | 0.10582951  | -1.82365239 |
| H  | 3.13046312  | -1.63406920 | -1.78008819 |
| S  | 0.74900341  | -1.15186775 | -1.65709627 |
| O  | 4.46417522  | 0.88334256  | 0.74355507  |
| H  | 1.79089963  | -0.02404881 | 1.76970792  |
| O  | 5.15977955  | -1.19706690 | 0.20557439  |
| Fe | -0.00033983 | 0.40848747  | 0.01295489  |
| S  | -0.74457818 | -1.27066875 | 1.56607366  |
| C  | -2.53150010 | -0.92737114 | 1.28116608  |
| C  | -2.81598258 | -0.74048948 | -0.20572935 |
| H  | -2.82432842 | -0.02467789 | 1.82678723  |
| H  | -3.12645602 | -1.75671422 | 1.66267908  |
| N  | -1.88376343 | 0.28287885  | -0.77370393 |
| H  | -2.64466619 | -1.68638575 | -0.72198677 |
| C  | -4.29731178 | -0.28893656 | -0.41866875 |
| H  | -2.44257021 | 1.14331353  | -0.73346508 |
| O  | -4.46448708 | 0.93232614  | -0.67653775 |

|   |             |             |             |
|---|-------------|-------------|-------------|
| O | -5.16184425 | -1.17746603 | -0.27140385 |
| H | -1.79203618 | 0.09367298  | -1.76921594 |
| C | 0.48949662  | 1.63336897  | -1.18637455 |
| O | 0.79257572  | 2.41826296  | -1.96348882 |
| C | -0.49253279 | 1.54514396  | 1.29519963  |
| O | -0.79645038 | 2.27381325  | 2.12495661  |

#### 14. STRUCTURE 4B (IN METHANOL)

##### General Information

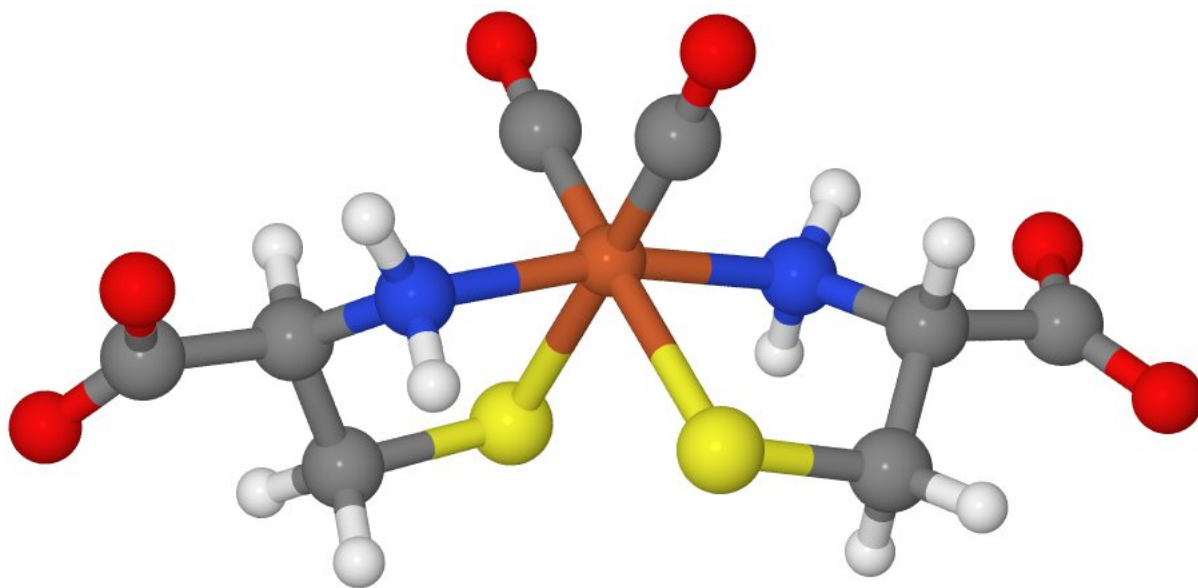

|                                 |   |                                                                                             |
|---------------------------------|---|---------------------------------------------------------------------------------------------|
| SMILES                          | : | C1C([NH2][Fe]2(S1)([NH2]C(CS2)C(=O)[O])([C][O])[C][O])C(=O)[O]                              |
| Formula                         | : | C <sub>8</sub> H <sub>10</sub> FeN <sub>2</sub> O <sub>6</sub> S <sub>2</sub> <sup>2-</sup> |
| Charge                          | : | -2                                                                                          |
| Multiplicity                    | : | 1                                                                                           |
| Energy                          | : | -2932.52493796 a.u.                                                                         |
| Number of imaginary frequencies | : | 0                                                                                           |

##### Cartesian Co-ordinates (XYZ format)

29

|    |             |             |             |
|----|-------------|-------------|-------------|
| N  | -1.97444856 | 0.53410542  | 0.51311827  |
| H  | -2.11526537 | 0.05906855  | 1.40936351  |
| C  | -2.86825848 | -0.20830967 | -0.42455360 |
| H  | -3.11270809 | 0.45260847  | -1.25857520 |
| C  | -2.12721825 | -1.43219328 | -0.95006704 |
| C  | -4.18481731 | -0.63912821 | 0.29813340  |
| H  | -1.95233917 | -2.12723255 | -0.12456372 |
| H  | -2.73829889 | -1.93140984 | -1.70179057 |
| S  | -0.50599688 | -0.96775711 | -1.68514538 |
| O  | -4.13872051 | -0.65806371 | 1.55514181  |
| H  | -2.39124250 | 1.45033145  | 0.66258591  |
| O  | -5.13386536 | -0.95500898 | -0.45094422 |
| Fe | 0.00008165  | 0.67257255  | 0.00390112  |
| S  | 0.50572675  | -0.98737526 | 1.67401505  |
| C  | 2.12706661  | -1.44337380 | 0.93385845  |
| C  | 2.86827922  | -0.21358030 | 0.42252058  |
| H  | 1.95231855  | -2.12901020 | 0.10049049  |
| H  | 2.73801684  | -1.95115066 | 1.67994130  |
| N  | 1.97467089  | 0.53988653  | -0.50648016 |
| H  | 3.11283851  | 0.43758246  | 1.26414812  |
| C  | 4.18480110  | -0.63608617 | -0.30514768 |
| H  | 2.11576366  | 0.07554954  | -1.40830064 |



|   |             |             |             |
|---|-------------|-------------|-------------|
| O | 4.13838911  | -0.64133865 | -1.56228292 |
| O | 5.13414574  | -0.95979381 | 0.44019681  |
| H | 2.39148927  | 1.45783079  | -0.64490497 |
| C | -0.32978430 | 1.85154557  | -1.29224348 |
| O | -0.52944684 | 2.60462809  | -2.13180423 |
| C | 0.32986635  | 1.83702552  | 1.31313848  |
| O | 0.52966321  | 2.58081818  | 2.16090536  |

### 15. STRUCTURE 5A (IN METHANOL)

#### General Information

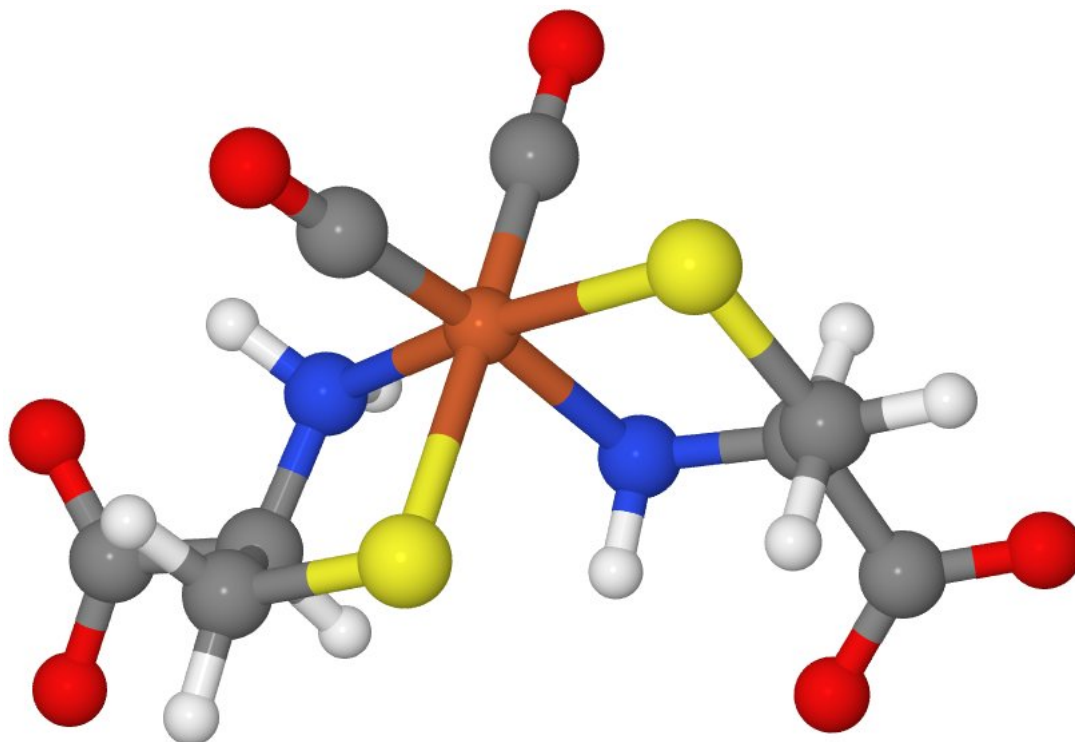

|                                 |   |                                                                                             |
|---------------------------------|---|---------------------------------------------------------------------------------------------|
| SMILES                          | : | C1C([NH2][Fe]2(S1)([NH2]C(CS2)C(=O)[O])([C][O])[C][O])C(=O)[O]                              |
| Formula                         | : | C <sub>8</sub> H <sub>10</sub> FeN <sub>2</sub> O <sub>6</sub> S <sub>2</sub> <sup>2-</sup> |
| Charge                          | : | -2                                                                                          |
| Multiplicity                    | : | 1                                                                                           |
| Energy                          | : | -2932.52879001 a.u.                                                                         |
| Number of imaginary frequencies | : | 0                                                                                           |

#### Cartesian Co-ordinates (XYZ format)

29

|    |             |             |             |
|----|-------------|-------------|-------------|
| N  | -1.14781570 | -0.83533949 | 0.50096136  |
| H  | -0.91347802 | -1.55457532 | -0.18747449 |
| C  | -2.62130761 | -0.64758927 | 0.39607263  |
| H  | -2.95989799 | -0.13024937 | 1.29638171  |
| C  | -2.91556334 | 0.22549975  | -0.81781089 |
| C  | -3.37298107 | -2.01247239 | 0.28197441  |
| H  | -2.65891051 | -0.31900617 | -1.73070896 |
| H  | -3.97880197 | 0.46230856  | -0.84691471 |
| S  | -1.95122302 | 1.79715431  | -0.75806421 |
| O  | -2.67690682 | -3.00260782 | -0.05424792 |
| H  | -0.96224684 | -1.27679873 | 1.39942968  |
| O  | -4.60254669 | -1.96451771 | 0.50861865  |
| Fe | 0.01782593  | 0.81929559  | 0.13990150  |
| S  | 0.63872045  | -0.15501040 | -1.95374453 |
| C  | 2.32661629  | -0.65986711 | -1.41238499 |
| C  | 2.31190753  | -1.19102514 | 0.01641492  |

|   |             |             |             |
|---|-------------|-------------|-------------|
| H | 2.99714041  | 0.20330644  | -1.47270465 |
| H | 2.70915365  | -1.42862809 | -2.08351827 |
| N | 1.61874330  | -0.20587343 | 0.90227479  |
| H | 1.75993454  | -2.13192821 | 0.04539411  |
| C | 3.77339077  | -1.42812693 | 0.51739931  |
| H | 2.38938189  | 0.38651156  | 1.23127687  |
| O | 4.24456215  | -0.53029299 | 1.26364851  |
| O | 4.33265495  | -2.45980263 | 0.09157201  |
| H | 1.33780003  | -0.70262676 | 1.74527848  |
| C | 0.97880149  | 2.20564151  | -0.43237492 |
| O | 1.57148981  | 3.09993458  | -0.83315194 |
| C | -0.43039247 | 1.57056475  | 1.69320679  |
| O | -0.72317058 | 2.08579779  | 2.67335272  |

## 16. STRUCTURE 5B (IN METHANOL)

### General Information

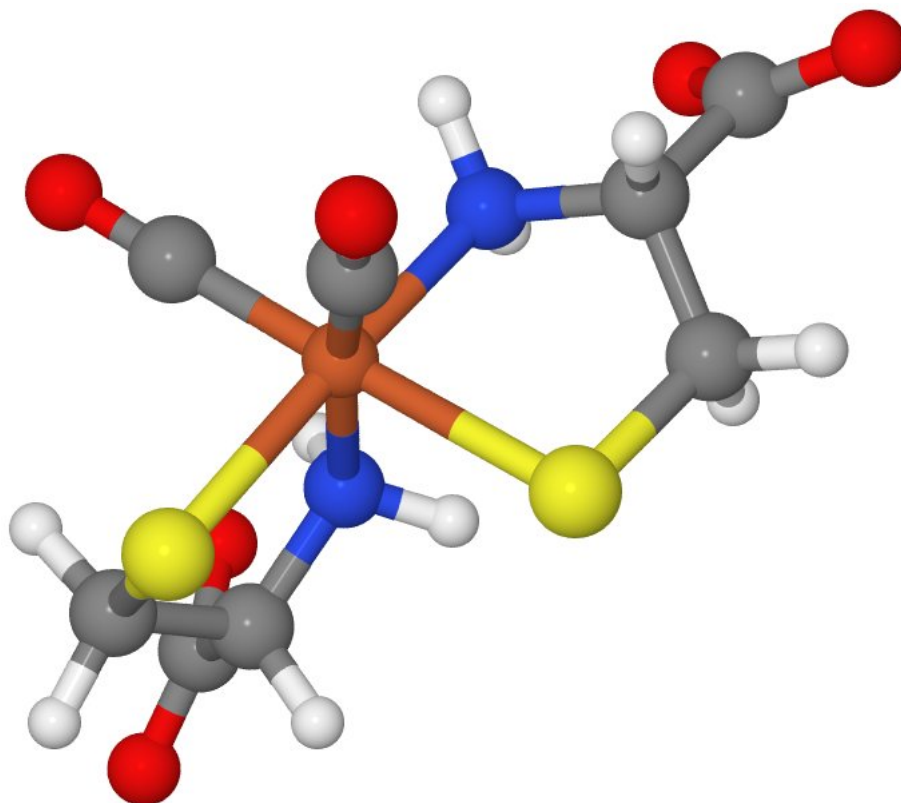

|                                 |   |                                                                                             |
|---------------------------------|---|---------------------------------------------------------------------------------------------|
| SMILES                          | : | C1C([NH2][Fe]2(S1)([NH2]C(CS2)C(=O)[O])([C][O])[C][O])C(=O)[O]                              |
| Formula                         | : | C <sub>8</sub> H <sub>10</sub> FeN <sub>2</sub> O <sub>6</sub> S <sub>2</sub> <sup>2-</sup> |
| Charge                          | : | -2                                                                                          |
| Multiplicity                    | : | 1                                                                                           |
| Energy                          | : | -2932.52865957 a.u.                                                                         |
| Number of imaginary frequencies | : | 0                                                                                           |

### Cartesian Co-ordinates (XYZ format)

29

|    |             |             |             |
|----|-------------|-------------|-------------|
| N  | 1.03037083  | -0.96221876 | -0.03399895 |
| H  | 1.16439593  | -1.54190707 | 0.80322272  |
| C  | 2.40733266  | -0.87656730 | -0.60661119 |
| H  | 2.32865167  | -0.91432899 | -1.69385946 |
| C  | 3.05122781  | 0.44680986  | -0.20667951 |
| C  | 3.27909946  | -2.07544947 | -0.10967527 |
| H  | 3.26229024  | 0.44537550  | 0.86707157  |
| H  | 3.99663162  | 0.56989813  | -0.73479331 |
| S  | 1.94674671  | 1.86767209  | -0.60609895 |
| O  | 2.83585954  | -2.69870067 | 0.89048338  |
| H  | 0.47621515  | -1.53134406 | -0.66905141 |
| O  | 4.34351683  | -2.26673388 | -0.73476660 |
| Fe | -0.00563462 | 0.80352968  | 0.21180299  |
| S  | -0.90971869 | 0.48271486  | -1.98182619 |

|   |             |             |             |
|---|-------------|-------------|-------------|
| C | -2.25975132 | -0.68011451 | -1.49260747 |
| C | -2.78032613 | -0.38674319 | -0.08956795 |
| H | -1.88279986 | -1.70733333 | -1.52784693 |
| H | -3.08037758 | -0.60546941 | -2.20575142 |
| N | -1.62376070 | -0.26965564 | 0.84644216  |
| H | -3.31298661 | 0.56605506  | -0.09036492 |
| C | -3.74341393 | -1.52851915 | 0.36796522  |
| H | -1.40872395 | -1.24072051 | 1.09383094  |
| O | -3.22913098 | -2.40811586 | 1.10618830  |
| O | -4.90729284 | -1.46983159 | -0.08138123 |
| H | -1.98178208 | 0.11214241  | 1.71897566  |
| C | 0.65543097  | 1.05512035  | 1.84698343  |
| O | 1.09000087  | 1.24086678  | 2.89027452  |
| C | -0.87958544 | 2.35553885  | 0.16972694  |
| O | -1.40750051 | 3.36979270  | 0.10767785  |

## 17. STRUCTURE 1 (IN WATER)

### General Information

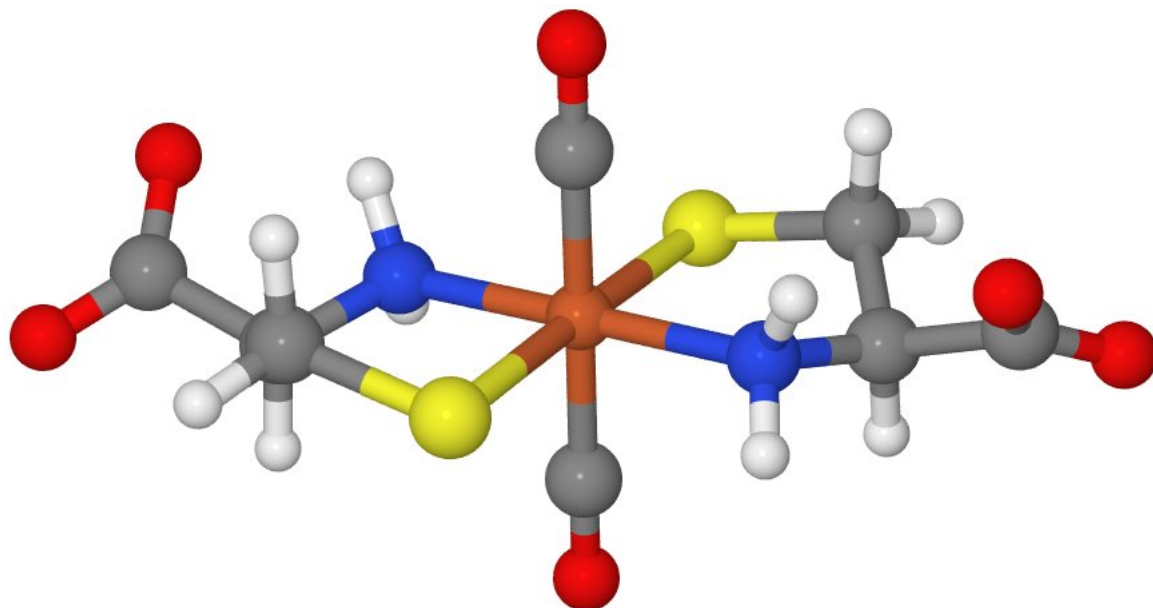

|                                   |   |                                                                                             |
|-----------------------------------|---|---------------------------------------------------------------------------------------------|
| SMILES                            | : | C1C([NH2][Fe]2(S1)([NH2]C(CS2)C(=O)[O])([C][O])[C][O])C(=O)[O]                              |
| Formula                           | : | C <sub>8</sub> H <sub>10</sub> FeN <sub>2</sub> O <sub>6</sub> S <sub>2</sub> <sup>2-</sup> |
| Charge                            | : | -2                                                                                          |
| Multiplicity                      | : | 1                                                                                           |
| Energy                            | : | -2932.52378554 a.u.                                                                         |
| Number of imaginary frequencies : | : | 0                                                                                           |

### Cartesian Co-ordinates (XYZ format)

29

|    |             |             |             |
|----|-------------|-------------|-------------|
| N  | -1.88105285 | -0.82249534 | 0.15454128  |
| H  | -2.13553739 | -1.31895268 | -0.70517117 |
| C  | -3.01402068 | 0.12876797  | 0.35601020  |
| H  | -3.11955476 | 0.31650227  | 1.42618001  |
| C  | -2.70147538 | 1.44578171  | -0.35172969 |
| C  | -4.34201479 | -0.47433877 | -0.20204060 |
| H  | -2.69903445 | 1.28092301  | -1.43400049 |
| H  | -3.48028302 | 2.17263293  | -0.12229520 |
| S  | -1.06447506 | 2.12294841  | 0.16052753  |
| O  | -4.20943737 | -1.40746236 | -1.03617573 |
| H  | -1.95239496 | -1.54672062 | 0.86543757  |
| O  | -5.39539766 | 0.05781438  | 0.20799775  |
| Fe | -0.00003726 | -0.00011142 | 0.15459377  |
| S  | 1.06449902  | -2.12339616 | 0.15466602  |
| C  | 2.70159578  | -1.44501698 | -0.35569787 |
| C  | 3.01397371  | -0.12958118 | 0.35503352  |
| H  | 2.69938588  | -1.27774239 | -1.43759906 |
| H  | 3.48035789  | -2.17237782 | -0.12772132 |
| N  | 1.88103545  | 0.82211417  | 0.15543838  |
| H  | 3.11929607  | -0.31966928 | 1.42480958  |
| C  | 4.34206581  | 0.47478941  | -0.20141584 |

|   |             |             |             |
|---|-------------|-------------|-------------|
| H | 2.13537550  | 1.32004130  | -0.70346582 |
| O | 4.20958519  | 1.40930295  | -1.03400207 |
| O | 5.39536428  | -0.05863465 | 0.20719656  |
| H | 1.95260763  | 1.54514110  | 0.86753500  |
| C | -0.00045026 | 0.00189377  | -1.67301512 |
| O | -0.00062638 | 0.00315035  | -2.81450319 |
| C | 0.00009836  | -0.00162961 | 1.98387253  |
| O | 0.00011379  | -0.00252957 | 3.12518048  |

## 18. STRUCTURE 2 (IN WATER)

### General Information

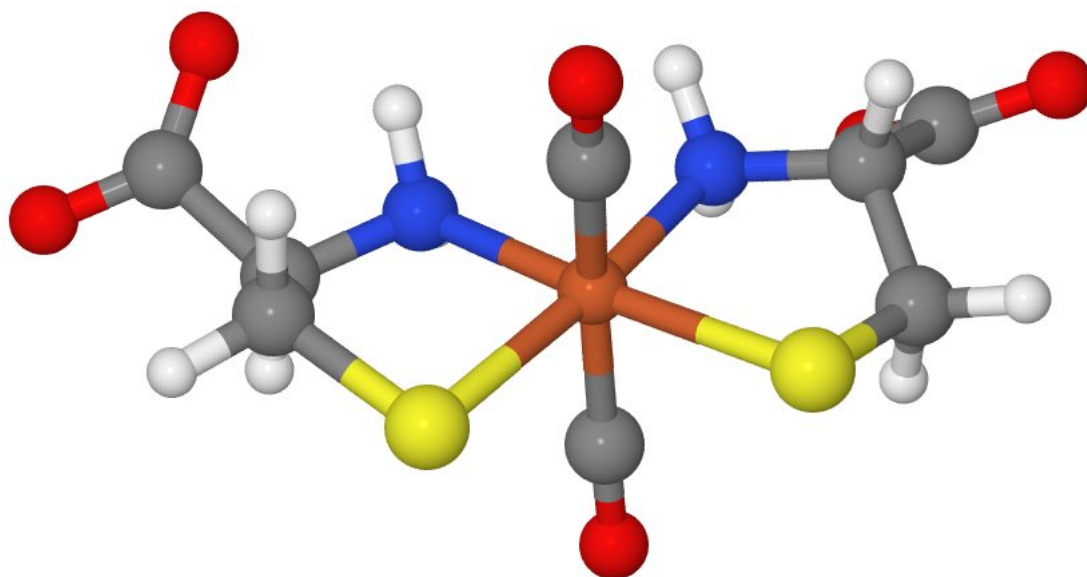

|                                 |   |                                                                                             |
|---------------------------------|---|---------------------------------------------------------------------------------------------|
| SMILES                          | : | C1C([NH2][Fe]2(S1)([NH2]C(CS2)C(=O)[O])([C][O])[C][O])C(=O)[O]                              |
| Formula                         | : | C <sub>8</sub> H <sub>10</sub> FeN <sub>2</sub> O <sub>6</sub> S <sub>2</sub> <sup>2-</sup> |
| Charge                          | : | -2                                                                                          |
| Multiplicity                    | : | 1                                                                                           |
| Energy                          | : | -2932.52522483 a.u.                                                                         |
| Number of imaginary frequencies | : | 0                                                                                           |

### Cartesian Co-ordinates (XYZ format)

29

|    |             |             |             |
|----|-------------|-------------|-------------|
| N  | 1.43863356  | 1.01074147  | 0.15354203  |
| H  | 1.57625163  | 1.57848942  | -0.68962973 |
| C  | 2.82177162  | 0.55164421  | 0.47849447  |
| H  | 2.89566994  | 0.41887465  | 1.55944705  |
| C  | 3.08422542  | -0.78643930 | -0.20827727 |
| C  | 3.87151766  | 1.60811257  | 0.00727880  |
| H  | 3.11702180  | -0.63432062 | -1.29190850 |
| H  | 4.05221224  | -1.17434740 | 0.10824660  |
| S  | 1.77404714  | -2.02011633 | 0.18816502  |
| O  | 3.47159624  | 2.42060304  | -0.86722183 |
| H  | 1.17200160  | 1.69525456  | 0.85774779  |
| O  | 5.00824928  | 1.51194847  | 0.51613742  |
| Fe | -0.00009068 | -0.43472001 | 0.00047010  |
| S  | -1.77414620 | -2.02034616 | -0.18674156 |
| C  | -3.08405137 | -0.78623164 | 0.20925038  |
| C  | -2.82190061 | 0.55110645  | -0.47905362 |
| H  | -3.11624074 | -0.63301176 | 1.29274344  |
| H  | -4.05222511 | -1.17441916 | -0.10635987 |
| N  | -1.43868148 | 1.01063037  | -0.15503871 |
| H  | -2.89614677 | 0.41710386  | -1.55983007 |
| C  | -3.87155151 | 1.60805309  | -0.00870150 |
| H  | -1.57615006 | 1.57985091  | 0.68716770  |



|   |             |             |             |
|---|-------------|-------------|-------------|
| O | -3.47100043 | 2.42240119  | 0.86378109  |
| O | -5.00831175 | 1.51158595  | -0.51744187 |
| H | -1.17205656 | 1.69387925  | -0.86047274 |
| C | 0.18078700  | -0.63711864 | -1.80670309 |
| O | 0.29513463  | -0.86172366 | -2.92154670 |
| C | -0.18102115 | -0.63408279 | 1.80798888  |
| O | -0.29542816 | -0.85688102 | 2.92318845  |

## 19. STRUCTURE 3A (IN WATER)

### General Information



|                                 |   |                                                                                             |
|---------------------------------|---|---------------------------------------------------------------------------------------------|
| SMILES                          | : | C1C([NH2][Fe]2(S1)([NH2]C(CS2)C(=O)[O])([C][O])[C][O])C(=O)[O]                              |
| Formula                         | : | C <sub>8</sub> H <sub>10</sub> FeN <sub>2</sub> O <sub>6</sub> S <sub>2</sub> <sup>2-</sup> |
| Charge                          | : | -2                                                                                          |
| Multiplicity                    | : | 1                                                                                           |
| Energy                          | : | -2932.53745613 a.u.                                                                         |
| Number of imaginary frequencies | : | 0                                                                                           |

### Cartesian Co-ordinates (XYZ format)

29

|   |             |             |             |
|---|-------------|-------------|-------------|
| N | -1.24450815 | -0.58797818 | -0.67482924 |
| H | -1.86879587 | -0.31357950 | -1.44086659 |
| C | -2.16518307 | -1.22152638 | 0.31219473  |
| H | -1.62195849 | -1.99803078 | 0.85456824  |
| C | -2.63801575 | -0.15768595 | 1.29842401  |
| C | -3.39048529 | -1.86557496 | -0.41501880 |
| H | -3.29945207 | 0.54669130  | 0.78500777  |
| H | -3.20357180 | -0.62495923 | 2.10458779  |
| S | -1.21245849 | 0.76802009  | 2.01819921  |
| O | -3.62134695 | -1.43532503 | -1.57476950 |
| H | -0.66134065 | -1.30396283 | -1.10243368 |

|    |             |             |             |
|----|-------------|-------------|-------------|
| O  | -4.03340530 | -2.70816445 | 0.24573138  |
| Fe | 0.00000296  | 0.90778995  | 0.00004477  |
| S  | 1.21253252  | 0.76820856  | -2.01809311 |
| C  | 2.63802767  | -0.15765831 | -1.29840112 |
| C  | 2.16511869  | -1.22158849 | -0.31230748 |
| H  | 3.29949045  | 0.54662269  | -0.78488636 |
| H  | 3.20357656  | -0.62486255 | -2.10460925 |
| N  | 1.24445713  | -0.58810973 | 0.67477185  |
| H  | 1.62185442  | -1.99799502 | -0.85478032 |
| C  | 3.39038348  | -1.86579156 | 0.41483968  |
| H  | 1.86875367  | -0.31382152 | 1.44083989  |
| O  | 3.62135029  | -1.43559647 | 1.57458985  |
| O  | 4.03322601  | -2.70836854 | -0.24599987 |
| H  | 0.66125792  | -1.30411625 | 1.10229588  |
| C  | -1.11939132 | 2.14471102  | -0.61718082 |
| O  | -1.85027897 | 2.93413830  | -1.00738358 |
| C  | 1.11944652  | 2.14462519  | 0.61735648  |
| O  | 1.85038769  | 2.93398261  | 1.00759840  |

## 20. STRUCTURE 3B (IN WATER)

### General Information



|                                 |   |                                                                                             |
|---------------------------------|---|---------------------------------------------------------------------------------------------|
| SMILES                          | : | C1C([NH2][Fe]2(S1)([NH2]C(CS2)C(=O)[O]))([C][O])[C][O]C(=O)[O]                              |
| Formula                         | : | C <sub>8</sub> H <sub>10</sub> FeN <sub>2</sub> O <sub>6</sub> S <sub>2</sub> <sup>2-</sup> |
| Charge                          | : | -2                                                                                          |
| Multiplicity                    | : | 1                                                                                           |
| Energy                          | : | -2932.53637468 a.u.                                                                         |
| Number of imaginary frequencies | : | 0                                                                                           |

### Cartesian Co-ordinates (XYZ format)

29

|    |             |             |             |
|----|-------------|-------------|-------------|
| N  | -1.16973376 | 0.40286461  | 0.81162703  |
| H  | -1.35309029 | 0.19029298  | 1.78967834  |
| C  | -2.46510959 | 0.68531495  | 0.13124268  |
| C  | -2.25881982 | 0.60654205  | -1.37905025 |
| H  | -3.22315550 | 0.67402488  | -1.88243210 |
| H  | -1.64966798 | 1.45324266  | -1.70941615 |
| S  | -1.43320870 | -0.96978724 | -1.87168610 |
| H  | -0.71127939 | 1.31819963  | 0.85937309  |
| Fe | -0.00008047 | -1.08116579 | -0.00003314 |
| S  | 1.43304992  | -0.96991438 | 1.87163699  |
| C  | 2.25894713  | 0.60630596  | 1.37908578  |
| C  | 2.46477246  | 0.68537015  | -0.13125491 |
| H  | 3.22345972  | 0.67340684  | 1.88218153  |
| H  | 1.65013027  | 1.45310903  | 1.70981252  |
| N  | 1.16903830  | 0.40353015  | -0.81118435 |
| H  | 1.35183012  | 0.19173655  | -1.78951359 |
| H  | 0.71058840  | 1.31891143  | -0.85791487 |
| C  | -1.04963839 | -2.31694174 | 0.73575586  |

|   |             |             |             |
|---|-------------|-------------|-------------|
| O | -1.73226106 | -3.10958171 | 1.19966781  |
| C | 1.04991233  | -2.31632948 | -0.73623323 |
| O | 1.73280704  | -3.10859370 | -1.20038545 |
| C | -3.00226665 | 2.10000134  | 0.51917094  |
| O | -2.14391828 | 2.90436578  | 0.96558523  |
| O | -4.21749830 | 2.29710269  | 0.30602032  |
| H | -3.18563080 | -0.07601007 | 0.43591249  |
| H | 3.18490529  | -0.07614900 | -0.43636629 |
| C | 3.00227284  | 2.09996510  | -0.51902586 |
| O | 2.14402056  | 2.90473390  | -0.96488011 |
| O | 4.21764946  | 2.29662251  | -0.30625787 |

21. STRUCTURE 4A (IN WATER)

General Information



|                                 |   |                                                                                             |
|---------------------------------|---|---------------------------------------------------------------------------------------------|
| SMILES                          | : | C1C([NH2][Fe]2(S1)([NH2]C(CS2)C(=O)[O])([C][O])[C][O])C(=O)[O]                              |
| Formula                         | : | C <sub>8</sub> H <sub>10</sub> FeN <sub>2</sub> O <sub>6</sub> S <sub>2</sub> <sup>2-</sup> |
| Charge                          | : | -2                                                                                          |
| Multiplicity                    | : | 1                                                                                           |
| Energy                          | : | -2932.53040800 a.u.                                                                         |
| Number of imaginary frequencies | : | 0                                                                                           |

Cartesian Co-ordinates (XYZ format)

29

|    |             |             |             |
|----|-------------|-------------|-------------|
| N  | 1.88427114  | 0.23848197  | 0.78633434  |
| H  | 2.44362307  | 1.09911108  | 0.79675347  |
| C  | 2.81182170  | -0.75097704 | 0.15512864  |
| H  | 2.62983346  | -1.72832453 | 0.60451233  |
| C  | 2.53429556  | -0.83331114 | -1.34246922 |
| C  | 4.29510736  | -0.32855827 | 0.40660104  |
| H  | 2.83345509  | 0.10344147  | -1.82334101 |
| H  | 3.12709308  | -1.63736522 | -1.77796221 |
| S  | 0.74720454  | -1.14757705 | -1.65901983 |
| O  | 4.47287560  | 0.87376690  | 0.73578179  |
| H  | 1.79557788  | -0.01014174 | 1.76900172  |
| O  | 5.15203953  | -1.21681046 | 0.21716346  |
| Fe | -0.00031975 | 0.41382471  | 0.01309061  |
| S  | -0.74226952 | -1.26674616 | 1.56671941  |
| C  | -2.52987790 | -0.92809182 | 1.28073180  |
| C  | -2.81292129 | -0.74067295 | -0.20630637 |
| H  | -2.82539701 | -0.02658392 | 1.82675922  |
| H  | -3.12263441 | -1.75936222 | 1.66150105  |
| N  | -1.88554537 | 0.28895867  | -0.77041084 |
| H  | -2.63479185 | -1.68450558 | -0.72376126 |
| C  | -4.29653358 | -0.29937774 | -0.42152613 |
| H  | -2.44507909 | 1.14829385  | -0.72296923 |
| O  | -4.47297573 | 0.92213941  | -0.67100763 |

|   |             |             |             |
|---|-------------|-------------|-------------|
| O | -5.15464115 | -1.19614828 | -0.28475934 |
| H | -1.79689956 | 0.10679922  | -1.76755571 |
| C | 0.48763752  | 1.63985491  | -1.18643916 |
| O | 0.78998220  | 2.42476940  | -1.96351826 |
| C | -0.49092788 | 1.55094445  | 1.29617250  |
| O | -0.79408020 | 2.27906227  | 2.12641072  |

## 22. STRUCTURE 4B (IN WATER)

### General Information



|                                 |   |                                                                                             |
|---------------------------------|---|---------------------------------------------------------------------------------------------|
| SMILES                          | : | C1C([NH2][Fe]2(S1)([NH2]C(CS2)C(=O)[O])([C][O])[C][O])C(=O)[O]                              |
| Formula                         | : | C <sub>8</sub> H <sub>10</sub> FeN <sub>2</sub> O <sub>6</sub> S <sub>2</sub> <sup>2-</sup> |
| Charge                          | : | -2                                                                                          |
| Multiplicity                    | : | 1                                                                                           |
| Energy                          | : | -2932.52998186 a.u.                                                                         |
| Number of imaginary frequencies | : | 0                                                                                           |

### Cartesian Co-ordinates (XYZ format)

29

|    |             |             |             |
|----|-------------|-------------|-------------|
| N  | -1.97704625 | 0.54311216  | 0.50393689  |
| H  | -2.12116480 | 0.07724526  | 1.40468347  |
| C  | -2.86756039 | -0.21117121 | -0.42732784 |
| H  | -3.12529063 | 0.44487360  | -1.26110578 |
| C  | -2.11959863 | -1.43041229 | -0.95486951 |
| C  | -4.17290401 | -0.65667397 | 0.30623019  |
| H  | -1.94183338 | -2.12599373 | -0.13059431 |
| H  | -2.72838259 | -1.93154335 | -1.70728374 |
| S  | -0.50063539 | -0.95811456 | -1.68936455 |
| O  | -4.11349630 | -0.68121856 | 1.56287813  |
| H  | -2.39496040 | 1.46074879  | 0.64119643  |
| O  | -5.12664747 | -0.97998804 | -0.43357632 |
| Fe | 0.00002658  | 0.68132859  | 0.00375006  |
| S  | 0.50029105  | -0.97655076 | 1.67806613  |
| C  | 2.11914611  | -1.44110990 | 0.93859273  |
| C  | 2.86759710  | -0.21618228 | 0.42516381  |
| H  | 1.94129133  | -2.12701511 | 0.10628771  |
| H  | 2.72754669  | -1.95117366 | 1.68529177  |
| N  | 1.97737277  | 0.54889262  | -0.49751675 |
| H  | 3.12520862  | 0.43025047  | 1.26644015  |
| C  | 4.17313051  | -0.65355718 | -0.31299260 |
| H  | 2.12164283  | 0.09355722  | -1.40358984 |



|   |             |             |             |
|---|-------------|-------------|-------------|
| O | 4.11416149  | -0.66410166 | -1.56982923 |
| O | 5.12659073  | -0.98521101 | 0.42350146  |
| H | 2.39525819  | 1.46809638  | -0.62398666 |
| C | -0.32370391 | 1.86197078  | -1.29280949 |
| O | -0.52012157 | 2.61530709  | -2.13261271 |
| C | 0.32416302  | 1.84694052  | 1.31379390  |
| O | 0.52062601  | 2.59043479  | 2.16230154  |

### 23. STRUCTURE 5A (IN WATER)

#### General Information



|                                 |   |                                                                                             |
|---------------------------------|---|---------------------------------------------------------------------------------------------|
| SMILES                          | : | C1C([NH2][Fe]2(S1)([NH2]C(CS2)C(=O)[O])([C][O])[C][O])C(=O)[O]                              |
| Formula                         | : | C <sub>8</sub> H <sub>10</sub> FeN <sub>2</sub> O <sub>6</sub> S <sub>2</sub> <sup>2-</sup> |
| Charge                          | : | -2                                                                                          |
| Multiplicity                    | : | 1                                                                                           |
| Energy                          | : | -2932.53375627 a.u.                                                                         |
| Number of imaginary frequencies | : | 0                                                                                           |

#### Cartesian Co-ordinates (XYZ format)

29

|    |             |             |             |
|----|-------------|-------------|-------------|
| N  | -1.14941490 | -0.82814401 | 0.51922631  |
| H  | -0.90873671 | -1.55778885 | -0.15625811 |
| C  | -2.62278986 | -0.64919460 | 0.39730427  |
| H  | -2.97739506 | -0.14070573 | 1.29625797  |
| C  | -2.91034222 | 0.22670095  | -0.81669682 |
| C  | -3.36026597 | -2.01959467 | 0.26106977  |
| H  | -2.64274883 | -0.31429881 | -1.72841501 |
| H  | -3.97440529 | 0.45896816  | -0.85515004 |
| S  | -1.95429289 | 1.80240893  | -0.74470514 |
| O  | -2.65436387 | -2.99483848 | -0.09863265 |
| H  | -0.96984637 | -1.25350392 | 1.42668498  |
| O  | -4.58955002 | -1.99079430 | 0.49170074  |
| Fe | 0.01672471  | 0.82394898  | 0.14568593  |
| S  | 0.62554067  | -0.16109335 | -1.94794893 |
| C  | 2.31553841  | -0.66496992 | -1.41242290 |
| C  | 2.30583930  | -1.19141185 | 0.01826543  |

|   |             |             |             |
|---|-------------|-------------|-------------|
| H | 2.98613906  | 0.19770667  | -1.47819781 |
| H | 2.69477367  | -1.43611038 | -2.08272576 |
| N | 1.61930370  | -0.20190686 | 0.90401018  |
| H | 1.75152969  | -2.13071275 | 0.05289171  |
| C | 3.76874542  | -1.43213797 | 0.51227587  |
| H | 2.39151859  | 0.39130390  | 1.22716892  |
| O | 4.24782562  | -0.53469247 | 1.25363827  |
| O | 4.32204723  | -2.46711564 | 0.08590972  |
| H | 1.34134901  | -0.69482219 | 1.75023413  |
| C | 0.97967154  | 2.20541787  | -0.43548083 |
| O | 1.57410836  | 3.09545803  | -0.84284735 |
| C | -0.42254981 | 1.58142710  | 1.69896400  |
| O | -0.71107239 | 2.10017300  | 2.67825127  |

## 24. STRUCTURE 5B (IN WATER)

### General Information

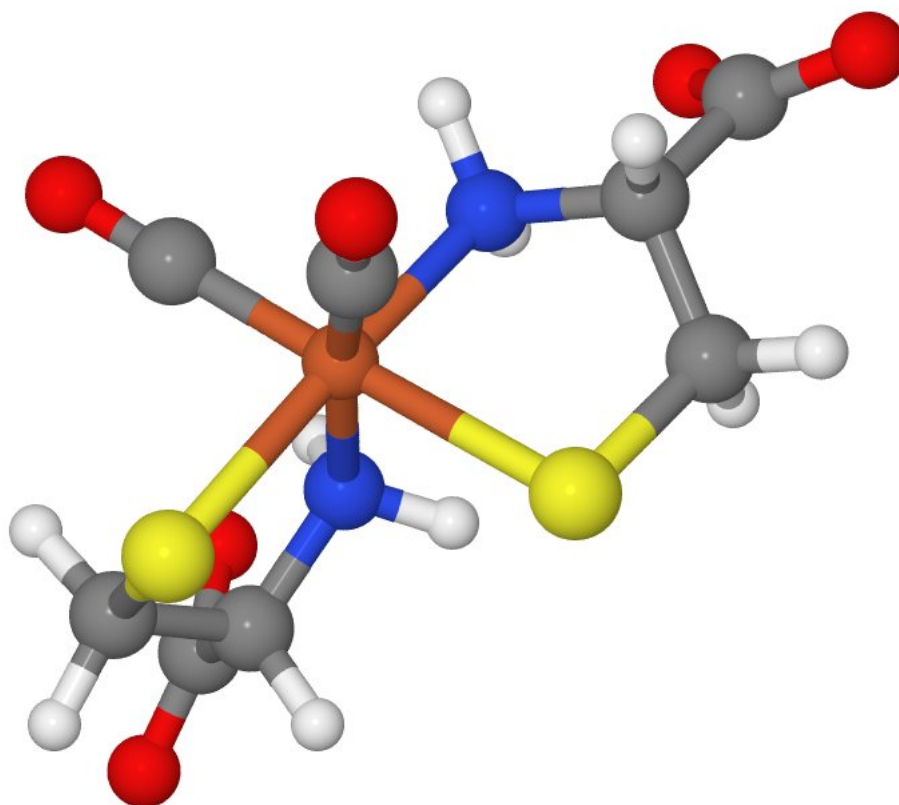

|                                 |   |                                                                                             |
|---------------------------------|---|---------------------------------------------------------------------------------------------|
| SMILES                          | : | C1C([NH2][Fe]2(S1)([NH2]C(CS2)C(=O)[O])([C][O])[C][O])C(=O)[O]                              |
| Formula                         | : | C <sub>8</sub> H <sub>10</sub> FeN <sub>2</sub> O <sub>6</sub> S <sub>2</sub> <sup>2-</sup> |
| Charge                          | : | -2                                                                                          |
| Multiplicity                    | : | 1                                                                                           |
| Energy                          | : | -2932.53350358 a.u.                                                                         |
| Number of imaginary frequencies | : | 0                                                                                           |

### Cartesian Co-ordinates (XYZ format)

29

|    |             |             |             |
|----|-------------|-------------|-------------|
| N  | 1.03139043  | -0.96259046 | -0.03273424 |
| H  | 1.16514063  | -1.54030991 | 0.80571514  |
| C  | 2.40806866  | -0.87654734 | -0.60570604 |
| H  | 2.32899308  | -0.91437662 | -1.69292247 |
| C  | 3.05171037  | 0.44717556  | -0.20643011 |
| C  | 3.28065825  | -2.07505441 | -0.11022107 |
| H  | 3.26234531  | 0.44690928  | 0.86737287  |
| H  | 3.99713278  | 0.57048649  | -0.73440880 |
| S  | 1.94655037  | 1.86715102  | -0.60719991 |
| O  | 2.83942032  | -2.69916296 | 0.89022762  |
| H  | 0.47776634  | -1.53356647 | -0.66659039 |
| O  | 4.34443188  | -2.26608062 | -0.73681027 |
| Fe | -0.00551107 | 0.80286652  | 0.21141437  |
| S  | -0.90965617 | 0.48072675  | -1.98218107 |

|   |             |             |             |
|---|-------------|-------------|-------------|
| C | -2.26096153 | -0.68070114 | -1.49305248 |
| C | -2.78006768 | -0.38641596 | -0.08959883 |
| H | -1.88507783 | -1.70824611 | -1.52872241 |
| H | -3.08167577 | -0.60476786 | -2.20599103 |
| N | -1.62304425 | -0.27079317 | 0.84584546  |
| H | -3.31103849 | 0.56725603  | -0.08992771 |
| C | -3.74502039 | -1.52625203 | 0.36787015  |
| H | -1.40678442 | -1.24176466 | 1.09208655  |
| O | -3.23189259 | -2.40935206 | 1.10265136  |
| O | -4.91005611 | -1.46365118 | -0.07842326 |
| H | -1.98027718 | 0.11037767  | 1.71900582  |
| C | 0.65429103  | 1.05494797  | 1.84742868  |
| O | 1.08875120  | 1.24098706  | 2.89051008  |
| C | -0.88089067 | 2.35446095  | 0.16963917  |
| O | -1.40971088 | 3.36805081  | 0.10691778  |
